# Supplementary material for: JNK1/2 represses Lkb1-deficiency-induced lung squamous cell carcinoma progression
Source: PubMed Central journal article supplement (PMC6517592; doi:10.1038/s41467-019-09843-1), 2019-05-14
Supplement: 41467_2019_9843_MOESM1_ESM.pdf [file 41467_2019_9843_MOESM1_ESM.pdf]

## Supplementary Information

Liu et al. JNK1/2 represses *Lkb1*-deficiency-induced Lung Squamous Cell Carcinoma Progression

### Supplementary Figures

**Supplementary Fig. 1** | Characterization of lung squamous cell carcinoma (LSCC) development stages in *Lkb1*<sup>d/d</sup> mice; Related to Fig. 1 and Table 1.

**Supplementary Fig. 2** | Characterization of lung adenocarcinoma in different mouse models; Related to Table 1.

**Supplementary Fig. 3** | Characterization of *Lkb1*<sup>d/d</sup> mouse lung SCC transcriptome profiles and lung tumors in *Lkb1*<sup>d/d</sup>*Pten*<sup>d/d</sup> mice; Related to Fig. 1 and 2 and Table 1.

**Supplementary Fig. 4** | Gene set enrichment analysis (GSEA) analysis of mouse lung tumors and kinome array analysis of mouse lungs; Related to Fig. 2 and Table 1.

**Supplementary Fig. 5** | MKK7 positively regulates p-JNK1/2 in human bronchial epithelial and squamous cell carcinoma cells; Related to Fig. 3.

**Supplementary Fig. 6** | Analyses of cell colony formation and lung tumor development after knockout of *Jnk1/2*; Related to Fig. 4.

**Supplementary Fig. 7** | Examination of the inhibition of lung tumor development after Anisomycin treatment; Related to Fig. 5.

**Supplementary Fig. 8** | P-JNK1/2 expression in the human lung SCCs and the survival analyses; Related to Fig. 6.

**Supplementary Fig. 9** | Full bots of the most important blots in the Figures; Related to Fig. 2, 3, 4 and 5.

**Supplementary Table 1** | Top molecular and cellular functions were enriched using Ingenuity pathway analysis (IPA) of DEGs identified in the microarray analysis of 13-month-old *Lkb1<sup>d/d</sup>*-SCC (Supplementary Data 3); Related to Fig. 1 and Table 1.

**Supplementary Table 2** | Summary of *Lkb1<sup>d/d</sup>Pten<sup>d/d</sup>* mouse lung phenotypes; Related to Fig. 2 and Table 1.

**Supplementary Table 3** | Top enriched upstream regulators were identified from these differentially expressed genes identified in the microarray analysis of 3-month-old *Lkb1<sup>d/d</sup>Pten<sup>d/d</sup>*- (SCC + ASC) (Supplementary Data 3) using Ingenuity Pathway Analysis (IPA); Related to Fig. 2 and Table 1.

**Supplementary Table 4** | Gene set enrichment analysis (GSEA) of enriched pathways in mouse lung tumors; Related to Fig. 1 and 2 and Table 1.

**Supplementary Table 5** | Summary table of quantification results of kinome array using ImageJ; Related to Fig. 2.

**Supplementary Table 6** | Calculation of the bands of p63 and  $\Delta Np63$  in Fig. 4e; Related to Fig. 4e.

**Supplementary Table 7** | List of the DEGs of p63 pathway, which are identified by IPA in Table 5. Genes labelled in red were upregulated while those labelled in blue were downregulated; Related to Fig. 4.

**Supplementary Table 8** | The LSCC patients' information of tissue array from Baylor College of Medicine; Related to Fig. 6 and Supplementary Fig. 8.

**Supplementary Table 9** | Sequence list of SYBR primers and gRNAs, Related to Fig. 3-5 and Supplementary Fig. 1, 5 and 6.

**Supplementary Fig. 1 | Characterization of lung squamous cell carcinoma (LSCC) development stages in *Lkb1*<sup>d/d</sup> mice; Related to Fig. 1 and Table 1.**

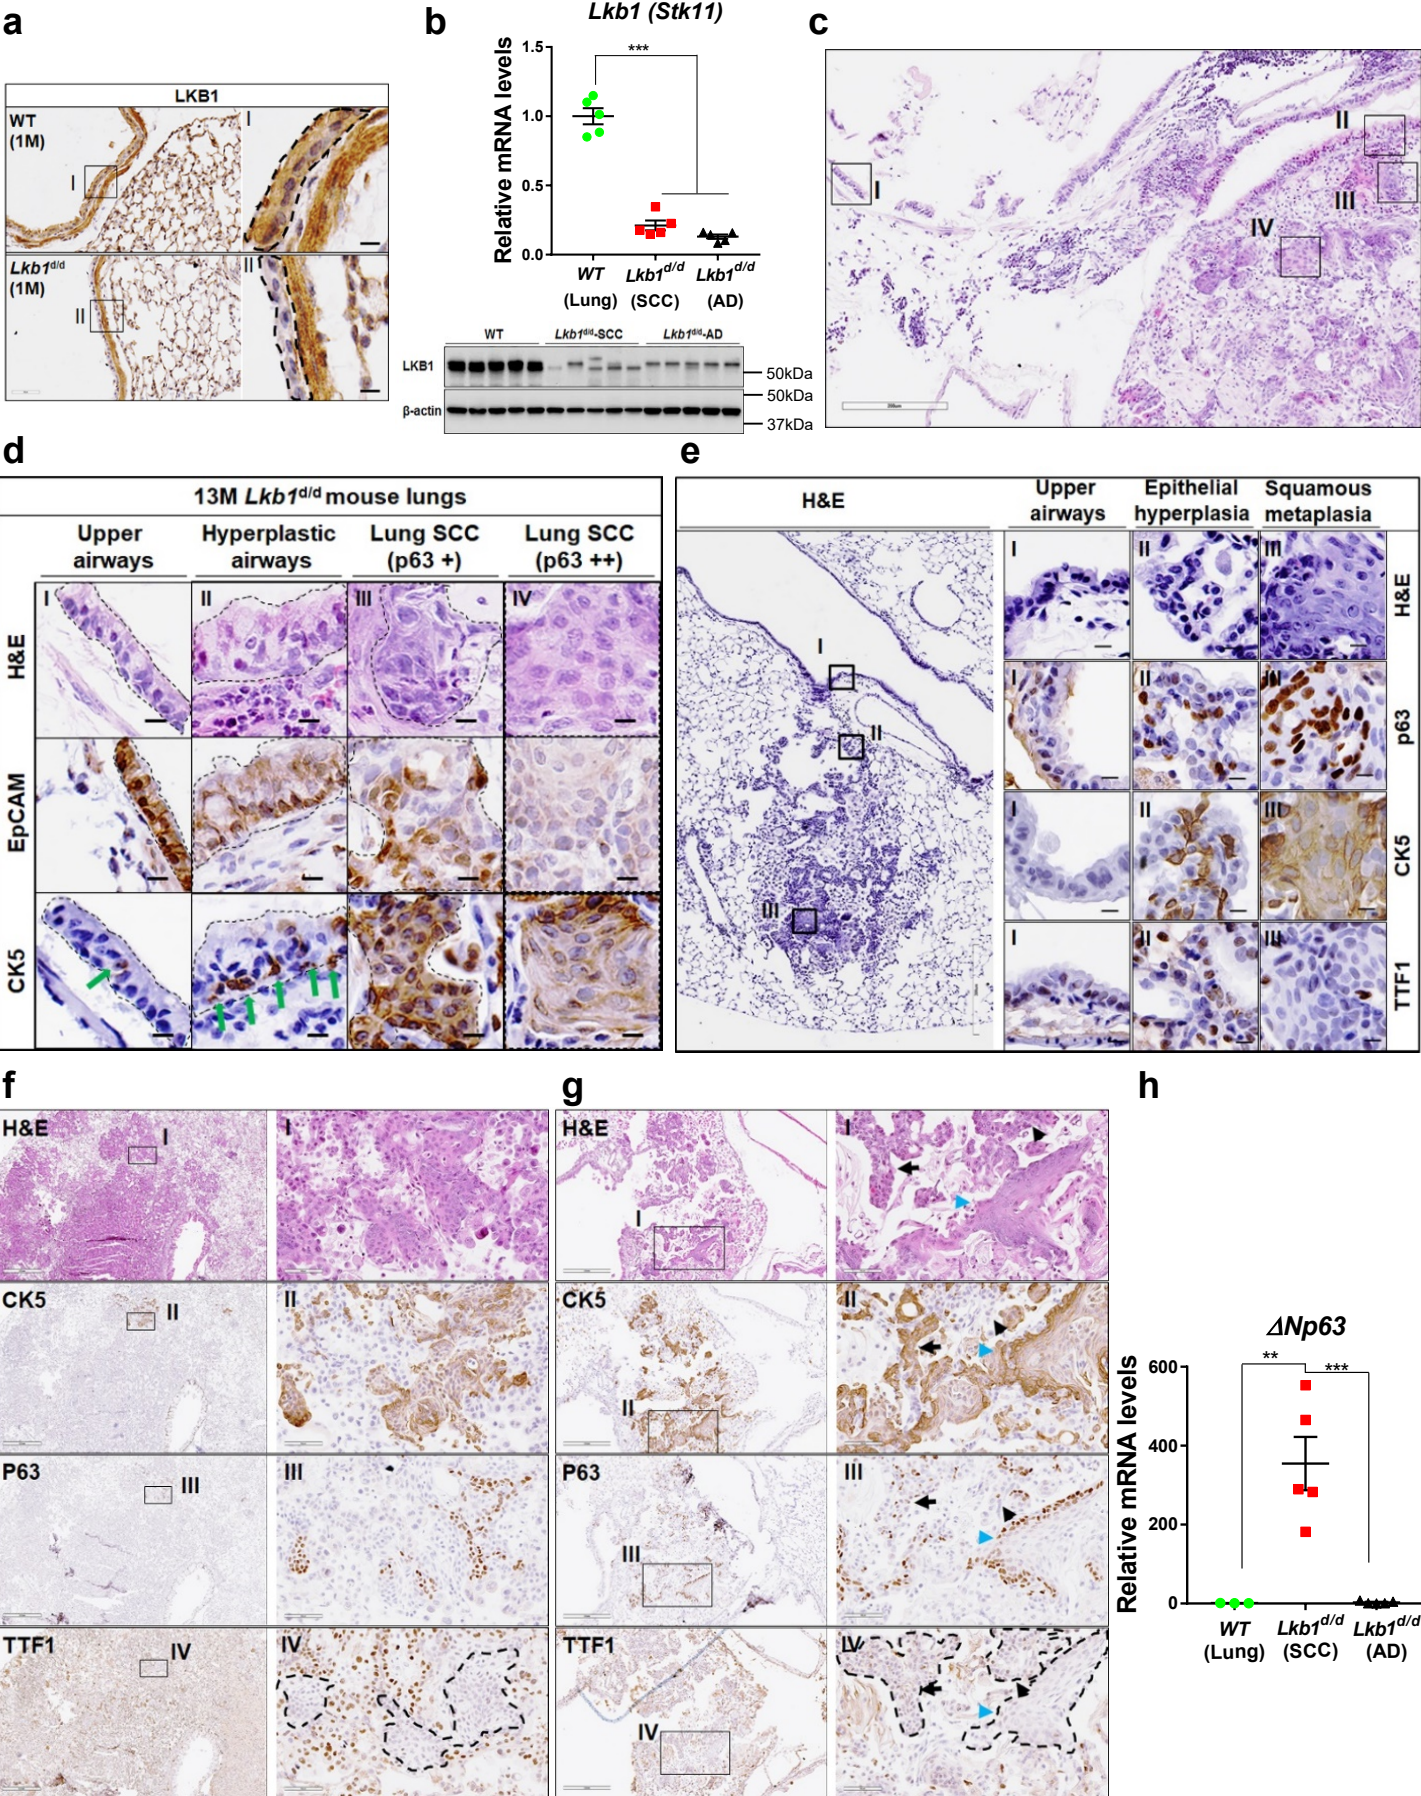

## Supplementary Information

### Supplementary Figures

#### Supplementary Fig. 1 | Characterization of lung squamous cell carcinoma (LSCC) development stages in *Lkb1<sup>dl/d</sup>* mice; Related to Fig. 1 and Table 1.

**a**, Representative immunohistochemistry analysis of protein expression in 1-month-old (1M) mouse lungs (n = 6). **b**, qRT-PCR (upper panel) and Western Blot (WB) (lower panel) analysis of mRNA and protein expression of LKB1 in 13-month-old mouse lungs and lung tumors, respectively (n = 5). Error bar is SEM; T test: \*\*\* P<0.001. SCC: squamous cell carcinoma; AD: Adenocarcinoma. **c**, Representative 13-month-old *Lkb1<sup>dl/d</sup>* mouse lung SCC (H&E). It includes the representative subareas shown in Fig. 1b. Box I: Upper airways; Box II: Hyperplastic airways; Box III: Lung SCC (p63 +); Box IV: Lung SCC (p63 ++). Scale bar: 200µm. **d**, Representative histopathology sections (H&E) and immunohistochemistry (IHC) staining of 13-month-old *Lkb1<sup>dl/d</sup>* mouse lung SCC. These subgroups of each H&E or marker staining were from the same staining slide, respectively (e.g., four H&E subgroups are indicated in the large area of Supplementary Fig. 1c). EpCAM: A marker of epithelial cells; SCC markers: CK5. CK5 is cytoplasmic staining and diffuse. Squamous cell carcinomas showed positive staining of CK5. Within the SCCs, the cells showing intercellular bridging and keratinization tended to show positivity for CK5. "+" means the expression is mild or moderate, and "++" means the expression is strong. Dashed outline: Regions of interest. Positive staining is indicated in some panels by green arrows. Scale bar: 10µm. **e**, Representative H&E and immunohistochemistry (IHC) staining results of lung epithelial hyperplasia with squamous metaplasia in a 13-month-old *Lkb1<sup>dl/d</sup>* mouse. The areas labelled by boxes are magnified as showing the increased expression of CK5 and p63 from airway to squamous metaplasia. Box I: Upper airways; Box II: Epithelial hyperplasia; Box III: squamous metaplasia. EpCAM: A marker of epithelial cells; SCC markers: p63 and CK5; AD marker: TTF1. Scale bar: 300µm (Black box) and 10µm (solid black). **f**, Representative H&E and IHC staining of adenocarcinoma (AD) with squamous differentiation (SqD) in a 13-month-old *Lkb1<sup>dl/d</sup>* mouse. The

areas labelled by boxes are magnified as showing the SqD cells (I) with positive staining of CK5 in the keratinizing cells (II) and p63 in the basal cells (III), and negative staining of TTF1 (IV) which is in the areas staining positive for CK5 and P63 and is also pointed by dash outlines. Scale bar: 600 $\mu$ m (Black box, left panel) and 60 $\mu$ m (Black box, right panel). **g**, Representative H&E and IHC staining results of lung adenosquamous carcinoma (ASC) in a 13-month-old *Lkb1<sup>del/del</sup>* mouse. The areas labelled by boxes are magnified as showing the ASC cells. The neoplasm has both adenocarcinoma (AD) component (black arrows) and squamous cell carcinoma (SCC) component (Blue arrowhead). Many AD cells had positive staining for CK5 (II) or p63 (III) while having negative or weak staining for TTF1 (IV). SCC cells had positive staining of CK5 (II) and p63 (III) while having negative staining for TTF1 (IV). Dash outlines pointed the areas of interest. Scale bar: 600 $\mu$ m (Black box, left panel) and 60 $\mu$ m (Black box, right panel). **h**, qRT-PCR analysis of gene expression in 13-month-old mouse lungs and lung tumors (n = 5). Error bar is SEM; T test: \*\* P < 0.01; \*\*\* P < 0.001.

**Supplementary Fig. 2 | Characterization of lung adenocarcinoma in different mouse models; Related to Table 1.**

**a**

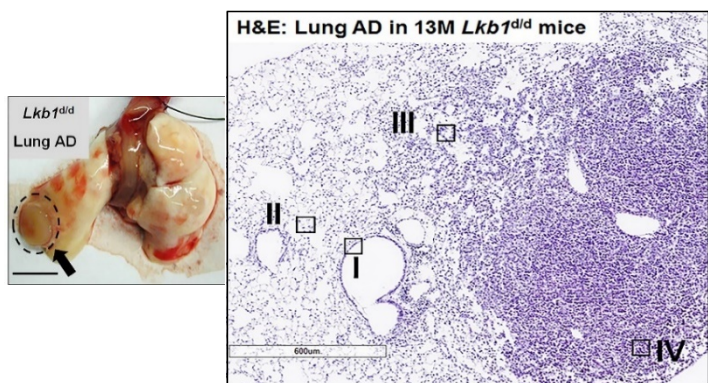

**b**

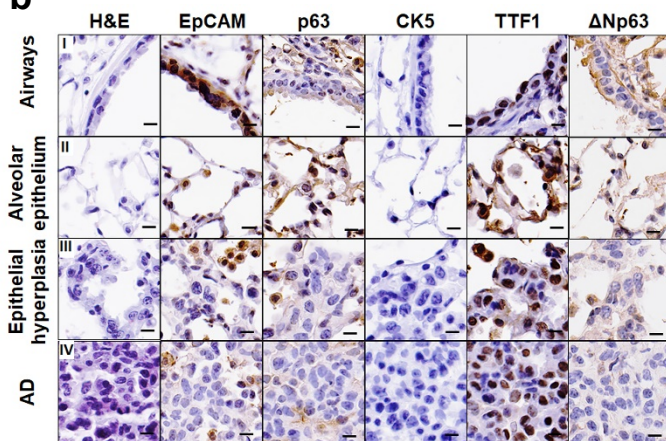

**c**

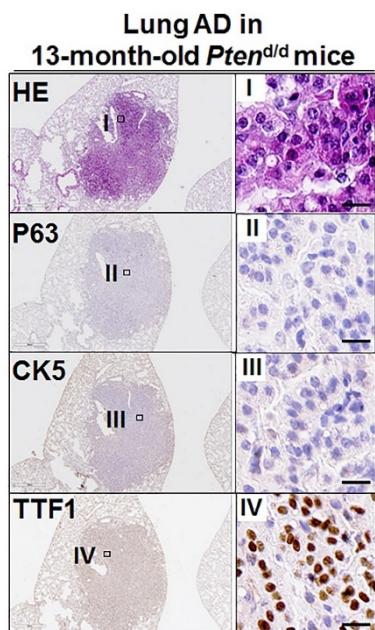

**d**

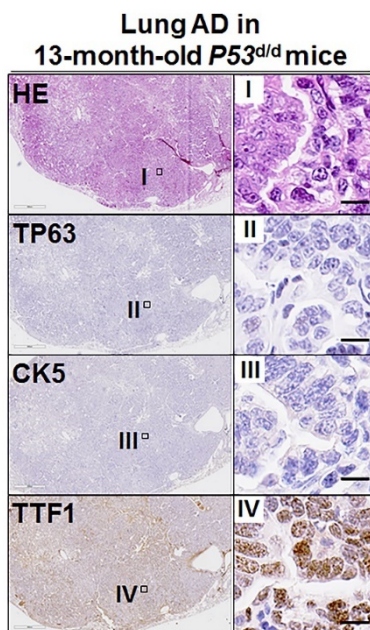

**e**

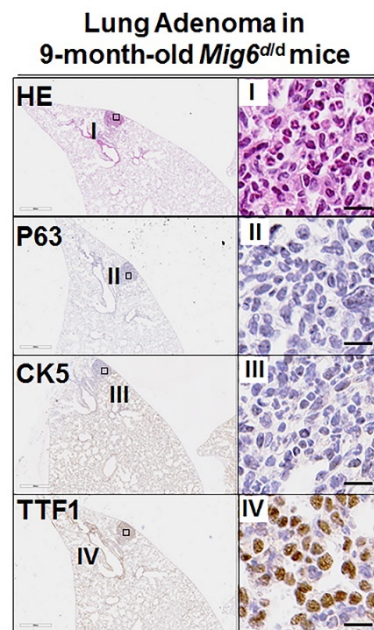

**f**

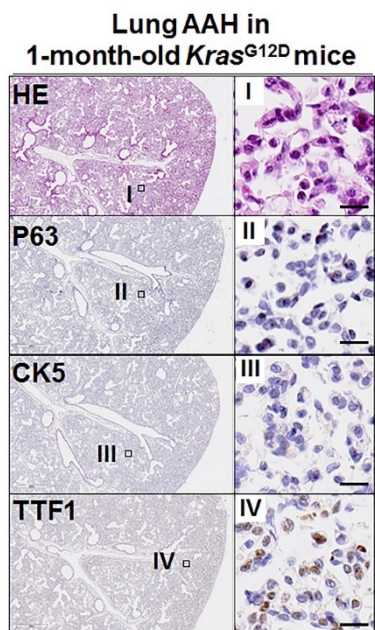

**g**

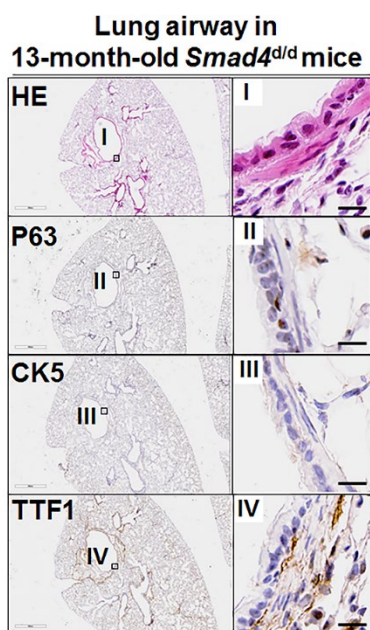

**h**

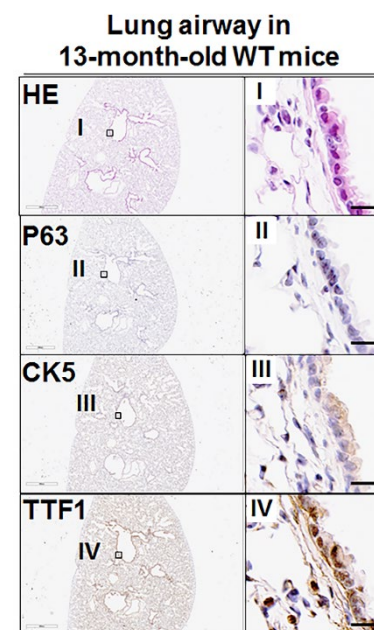

**Supplementary Fig. 2 | Characterization of lung adenocarcinoma in different mouse models; Related to Table 1.**

**a**, Gross appearance of and representative H&E and IHC staining of 13-month-old *Lkb1<sup>d/d</sup>* mouse lung AD. Left panel: Gross appearance of lung tumors in 13-month-old *CCSP<sup>Cre</sup>Lkb1<sup>fl/fl</sup> (Lkb1<sup>d/d</sup>)* mice. AD was labelled by a dash cycle and an arrow. Scale bar: 0.5cm. Right panel: Representative 13-month-old *Lkb1<sup>d/d</sup>* mouse lung AD (H&E). Box I: Airways; Box II: Alveolar epithelium; Box III: Epithelial hyperplasia (EH); Box IV: AD; Scale bar: 600µm. **b**, These subgroups of each H&E or marker staining were from the same staining slide, respectively (e.g., four H&E subgroups are indicated in the large area of right panel); EpCAM: A marker of epithelial cells; SCC markers: p63, ΔNp63 and CK5; AD marker: TTF1; Scale bar of each area: 10µm. **c-h**, Representative H&E and IHC staining of lungs in 13-month-old *Pten<sup>d/d</sup>* mice (**c**), in 13-month-old *P53<sup>d/d</sup>* mice (**d**), in 9-month-old *Mig6<sup>d/d</sup>* mice (**e**), in 1-month-old *Kras<sup>G12D</sup>* mice (**f**), in 13-month-old *Smad4<sup>d/d</sup>* mice (**g**) and in 13-month-old wild type (WT) mice (**h**). Scale bars: 600µm (Black box) and 15µm (dark bar).

**Supplementary Fig. 3 | Characterization of *Lkb1*<sup>did</sup> mouse lung SCC transcriptome profiles and lung tumors in *Lkb1*<sup>did</sup>*Pten*<sup>did</sup> mice; Related to Fig. 1 and 2 and Table 1.**

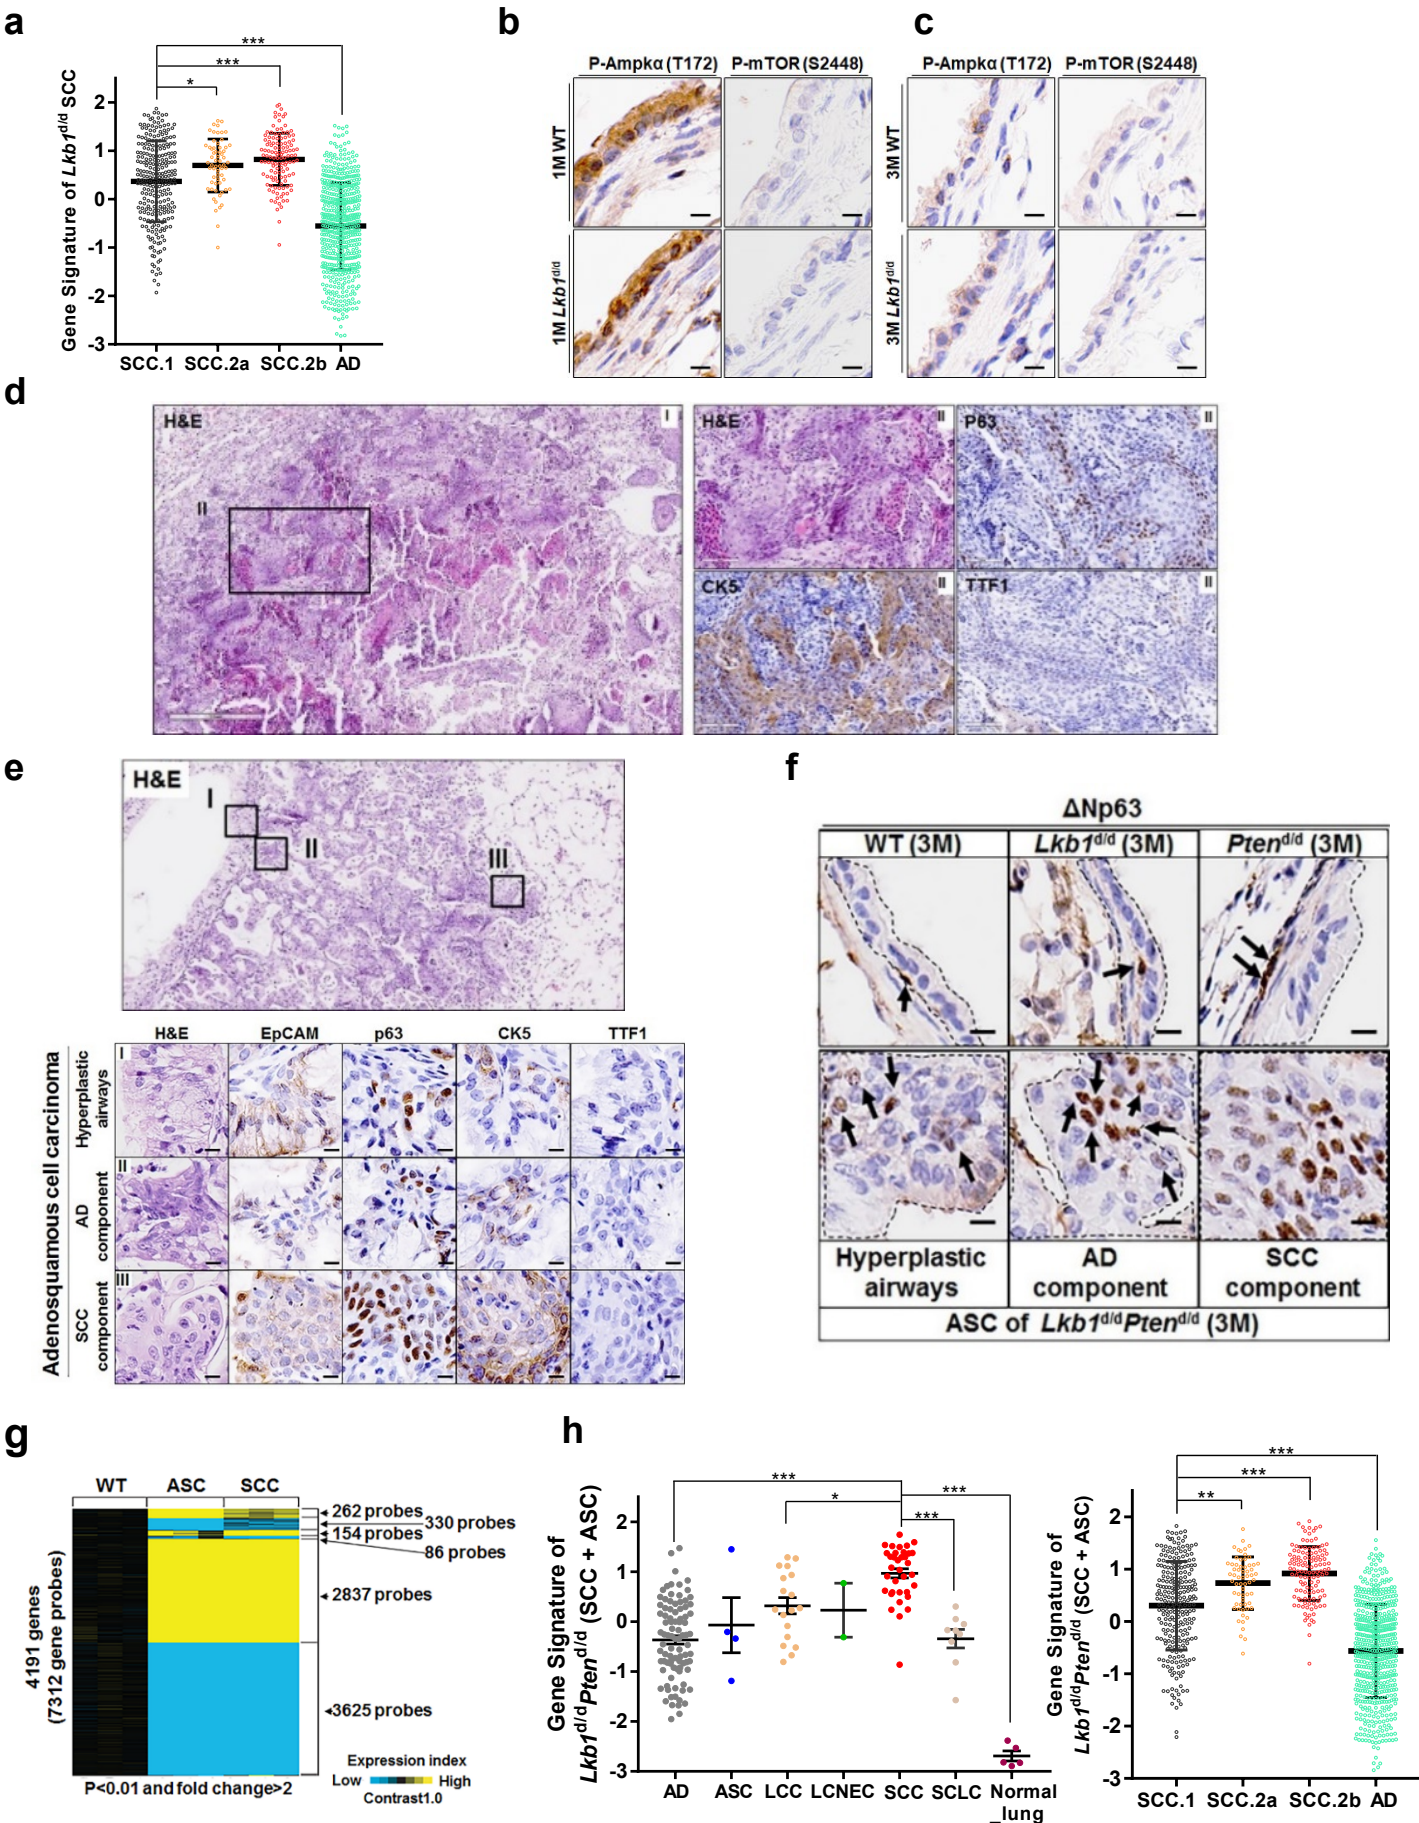



**Supplementary Fig. 3 | Characterization of *Lkb1*<sup>d/d</sup> mouse lung SCC transcriptome profiles and lung tumors in *Lkb1*<sup>d/d</sup>*Pten*<sup>d/d</sup> mice; Related to Fig. 1 and 2 and Table 1.**

**a**, Distribution of the alignment of the gene signature of 13-month-old *Lkb1*<sup>d/d</sup> mouse lung tumors with TCGA human lung tumors (SCC.1, n = 259; SCC.2a, n = 62; SCC.2b, n = 123; AD.1, n = 579). The gene signatures were generated using the differentially changed genes (DEGs) identified in the microarray analysis of 13-month-old *Lkb1*<sup>d/d</sup>-SCC (Supplementary Data 3). ANOVA (Tukey-Kramer Multiple Comparisons (TKMC) Test) was performed and error bar is SEM; \* P < 0.05; \*\*\* P < 0.001. **b and c**, Representative IHC analysis of protein expression in 1-month-old (1M) (**b**) and 3-month-old (3M) (**c**) mouse lungs (n = 6). **d**, Representative H&E and IHC staining of lung SCCs in 3-month-old *Lkb1*<sup>d/d</sup>*Pten*<sup>d/d</sup> mice. SCC markers: p63 and CK5; AD marker: TTF1. Scale bar: 600µm (Black box, upper panel) and 60µm (Black box, lower panel). **e**, Representative H&E and IHC staining of lung adenosquamous carcinoma (ASC) in 3-month-old *Lkb1*<sup>d/d</sup>*Pten*<sup>d/d</sup> mice (n = 6). EpCAM: A marker of epithelial cell; Box I: Hyperplastic airway; Box II: Adenocarcinoma (AD) component; Box III: Peripheral squamous cell carcinoma (SCC) component; Scale bar: 100µm. These subgroups of each H&E or marker staining were from the same staining slide, respectively (e.g., four H&E subgroups are indicated in the large area of Supplementary Fig. 3e (upper panel)). SCC markers: p63 and CK5; AD marker: TTF1; Scale bar of each area: 10µm. Similar to the observation of ASCs in *Lkb1*<sup>d/d</sup> mice (Supplementary Fig. 1g), the portions of ASCs consisting of AD cells also exhibited the same marker expression of SCC cells in *Lkb1*<sup>d/d</sup>*Pten*<sup>d/d</sup> mice (Supplementary Fig. 3g). **f**, Representative ΔNp63 IHC staining (focal and nuclear staining) of 3-month-old (3M) mouse lungs and lung tumors (n = 6). AD: Adenocarcinoma; Dashes outline: Regions of interest. Arrows were used to point to nuclear staining of P63; Scale bar: 10µm. **g**, Heatmap of the probes of differentially expressed genes (DEGs) between tumors (ASC, n= 3, or SCC, n= 3) and wild type (WT, n= 3) lungs. The detailed information is supplied in Supplementary Data 3. **h**, Gene signature analysis of the differentially changed genes identified in the microarray analysis of 3-month-old *Lkb1*<sup>d/d</sup>*Pten*<sup>d/d</sup>-(SCC + ASC)

(Supplementary Data 3). The left panel was analyzed as similar as that of Fig. 1c using Takeuchi human lung cancer database (GSE11969) and the right panel was performed as Supplementary Fig. 3a using TCGA human lung cancer database.

a

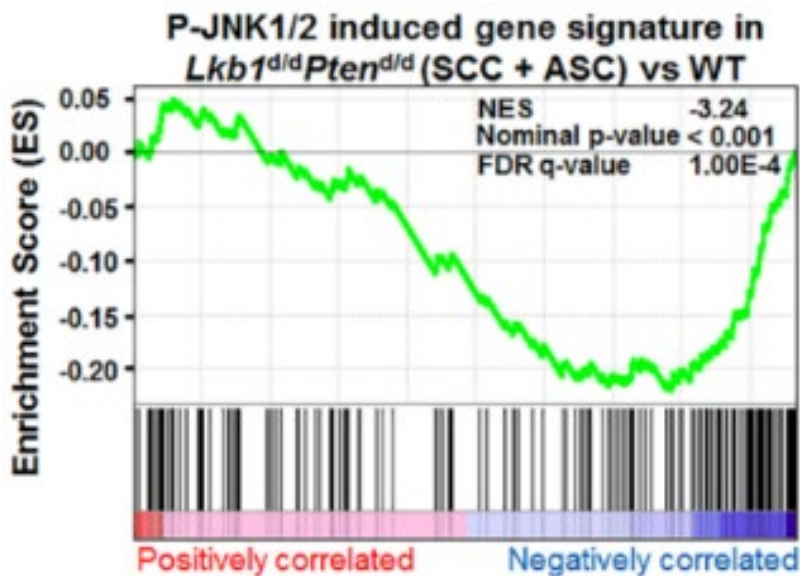

b

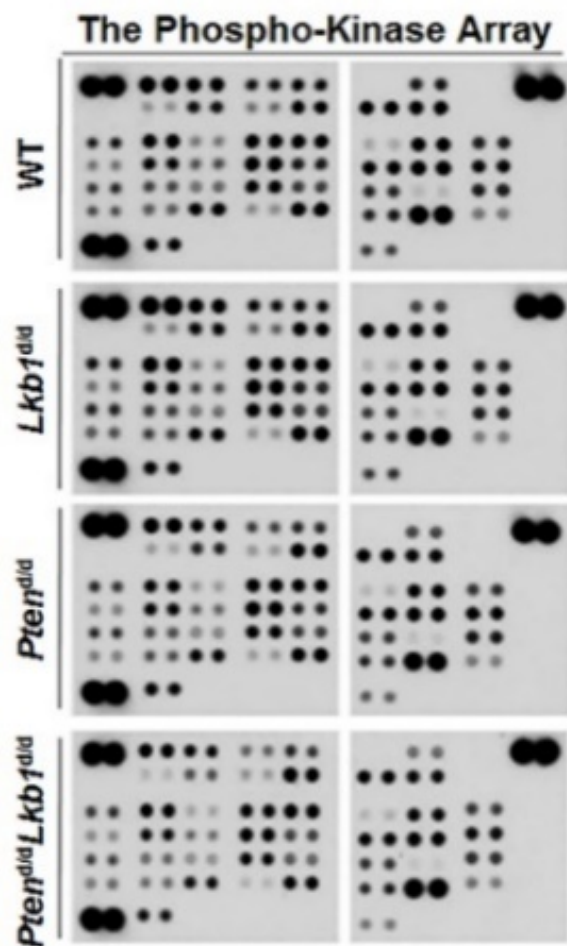

c

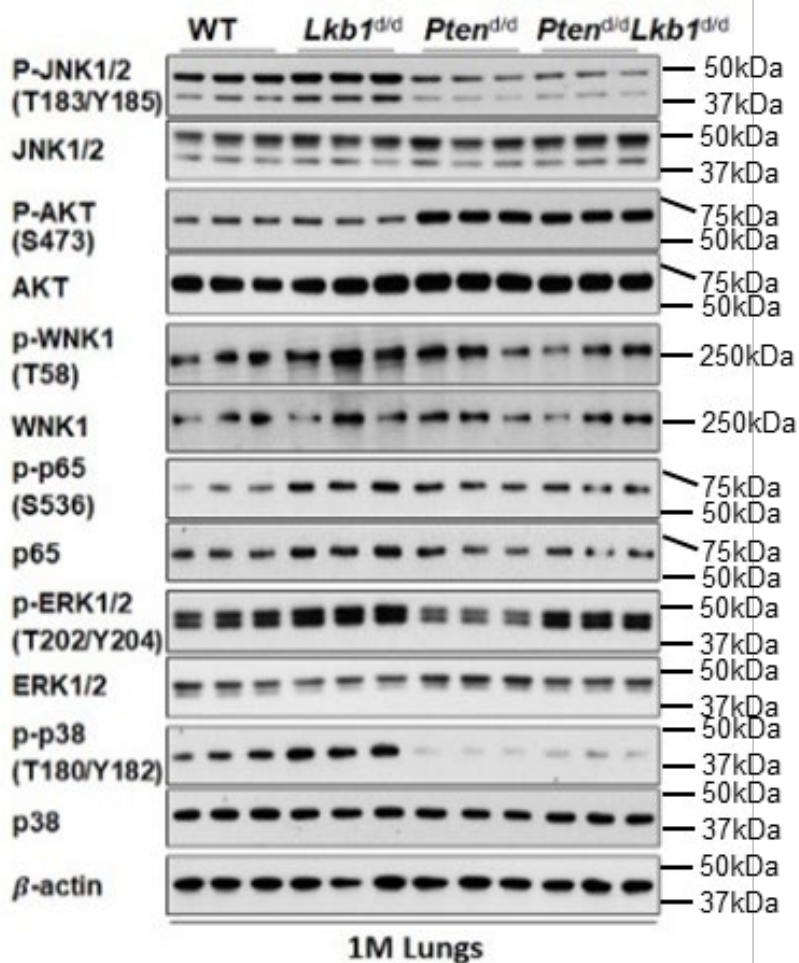

**Supplementary Fig. 4 | Gene set enrichment analysis (GSEA) analysis of mouse lung tumors and kinome array analysis of mouse lungs; Related to Fig. 2 and Table 1.**

**a**, GSEA of pre-ranked genes detected in microarrays analysis of 3-month-old *Lkb1<sup>d/d</sup>Pten<sup>d/d</sup>* mouse lung SCC and ASC tumors. All detected genes (Supplementary Data 3) were ranked based on their fold changes (*Lkb1<sup>d/d</sup>Pten<sup>d/d</sup>*-(SCC + ASC) vs WT) from high (the left terminal of X-axis) to low (the right terminal of X-axis). ASC: Adenosquamous cell carcinoma. **b-c**, Summary of kinome array performed in 1-month-old (1M) mouse lungs. **(b)** Full map of kinome array performed in 1-month-old mouse lungs; **(c)** WB analysis of candidate pathways identified in kinome array using 1-month-old (1M).

**Supplementary Fig. 5 | MKK7 positively regulates p-JNK1/2 in human bronchial epithelial and squamous cell carcinoma cells; Related to Fig. 3.**

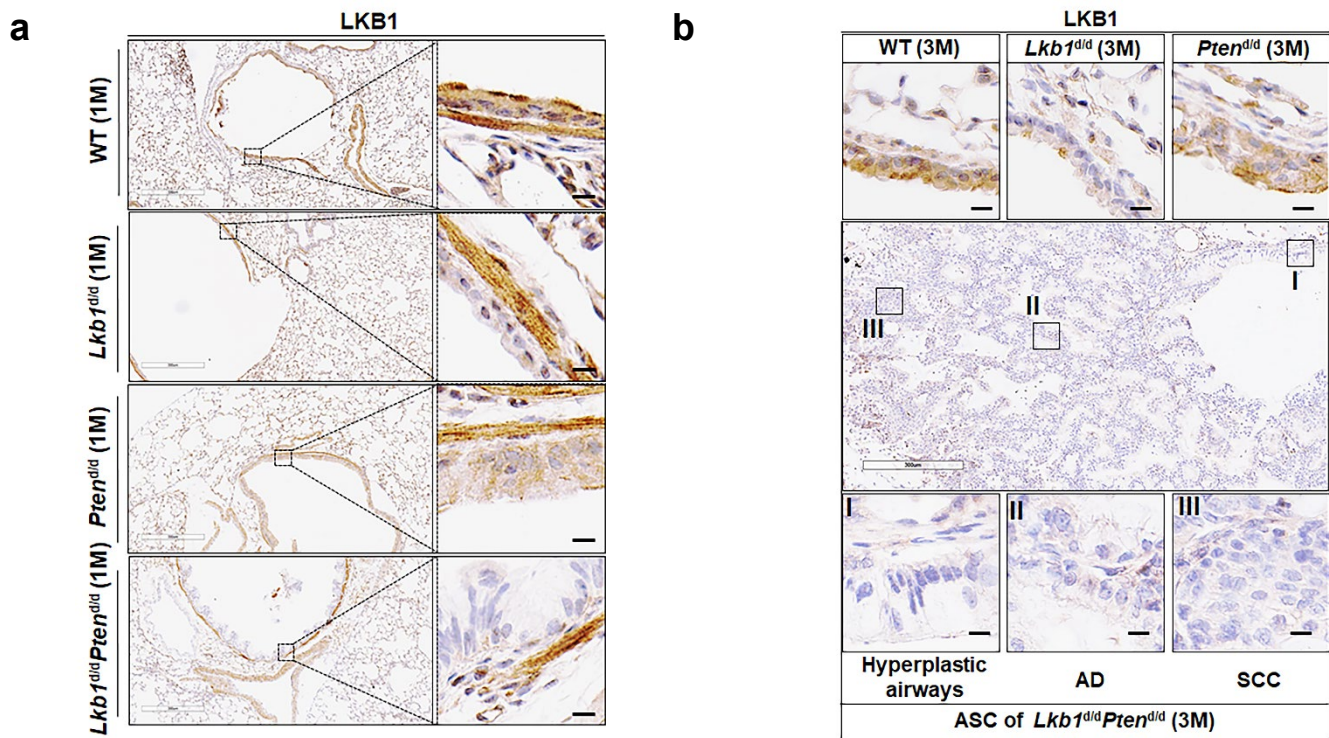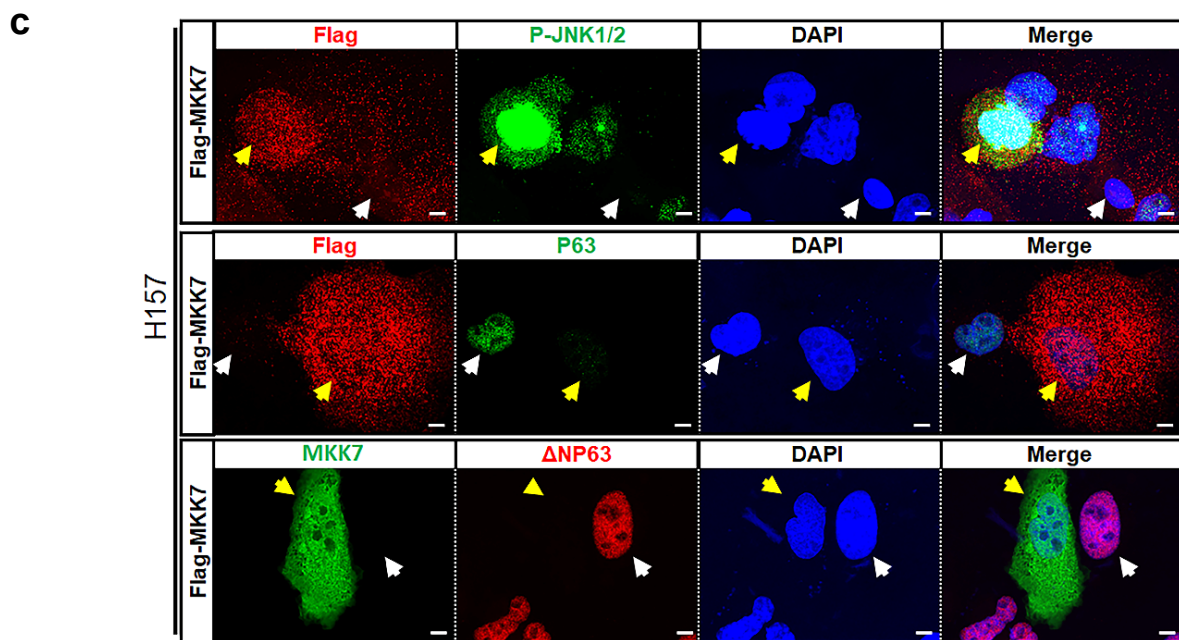

**Supplementary Fig. 5 | MKK7 positively regulates p-JNK1/2 in human bronchial epithelial and squamous cell carcinoma cells; Related to Fig. 3.**

**a-b**, Representative IHC staining of LKB1 in 1-month-old mouse lungs (n = 5) (**a**) and in 3-month-old mouse lungs and lung tumors (n = 6) (**b**). Box I: Hyperplastic airway; Box II: Adenocarcinoma (AD) component; Box III: peripheral squamous cell carcinoma (SCC) component. Scale bar: 300 $\mu$ m (Black box) and 10 $\mu$ m (dark bar). **c**, Co-staining of Flag/MKK7 and pJNK1/2 or p63 or  $\Delta$ Np63 in human LSCC cells. Scale bar: 50 $\mu$ m; Yellow arrows point out the cells expressing the exogenous Flag-MKK7; White arrows point out the cells without clear expression of the exogenous Flag-MKK7. **d**, WB analysis of protein expressions in Beas-2B cells, an immortalized human bronchial epithelial cell line, after knockout of *LKB1* or scramble (Control) using lentiviral Cas9/gRNA with the treatment of TNF $\alpha$  (20 ng/ml). **e**, WB analysis of protein expressions in Beas-2B cells after knockout of *MKK7* or scramble (Control) using lentiviral Cas9/gRNA under 5-hour (hr) treatment of TNF $\alpha$  (20 ng/ml). **f**, MTS assay analysis of cell viability of Beas-2B. -: parental cells; gControl: gRNA targeting non-coding region; g*LKB1*: gRNA targeting *LKB1*; g*MKK7*: gRNA targeting *MKK7*.

**Supplementary Fig. 6 | Analyses of cell colony formation and lung tumor development after knockout of *Jnk1/2*; Related to Fig. 4.**

**a**

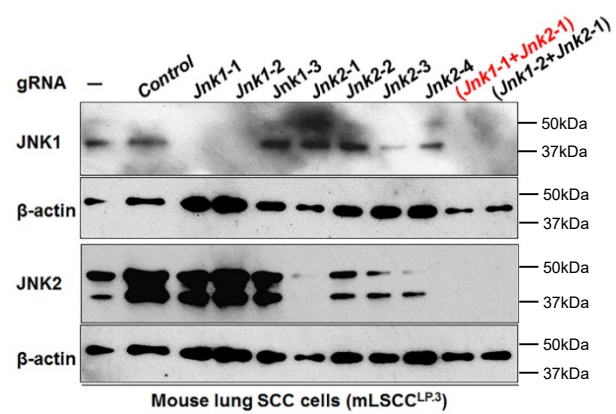

**b**

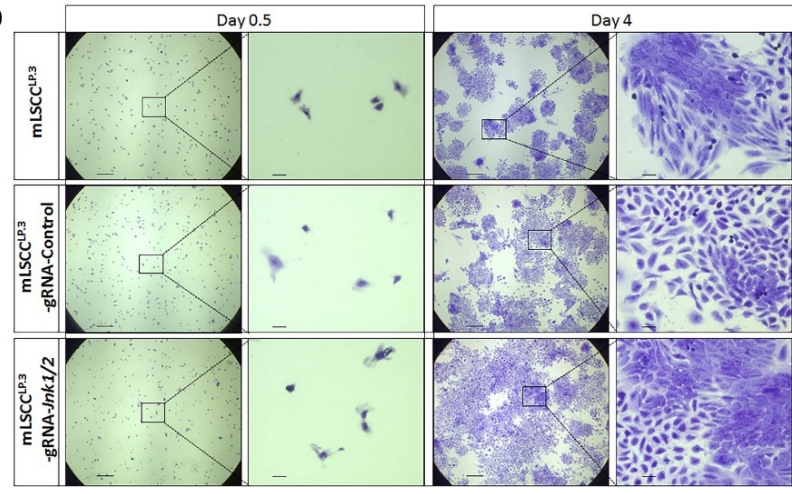

**c**

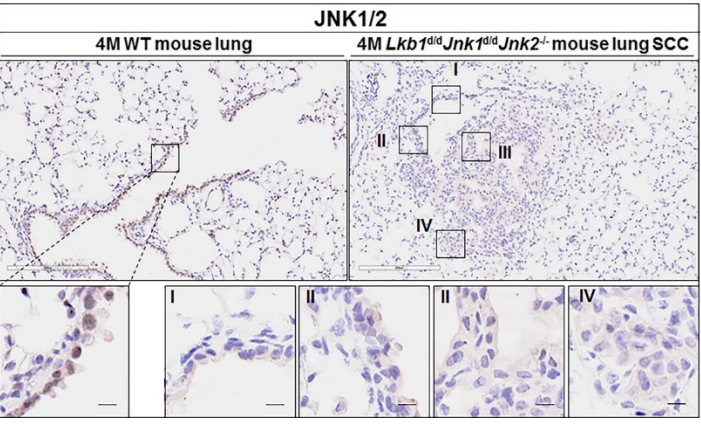

**d**

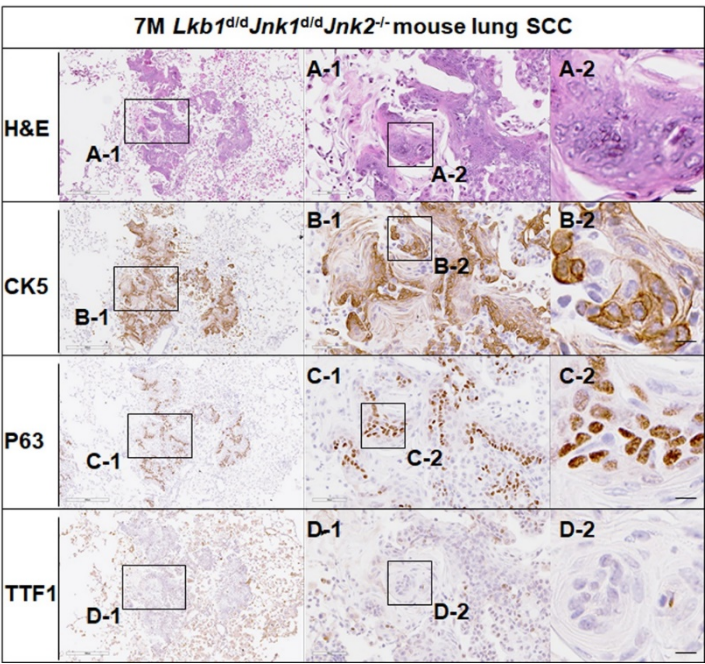

**e**

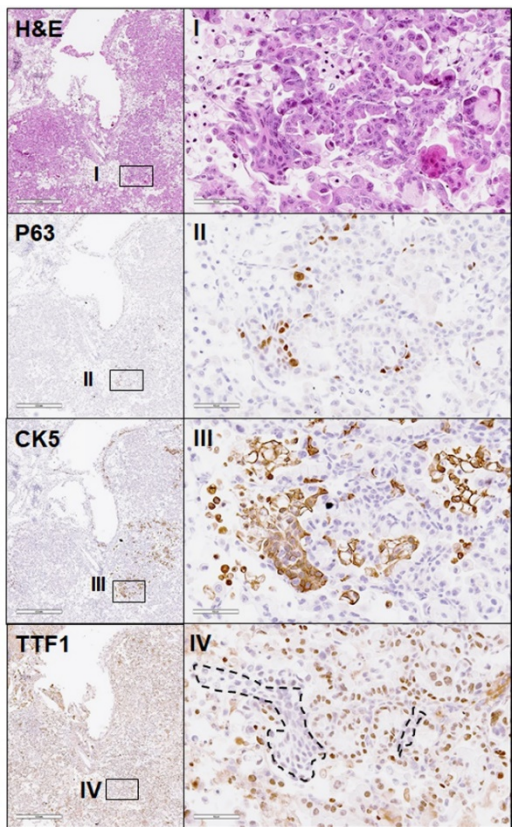

**f**

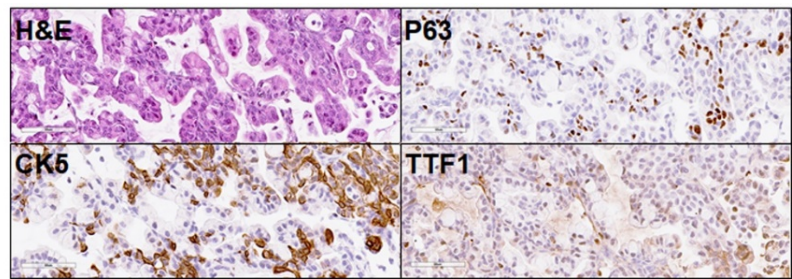

**g**

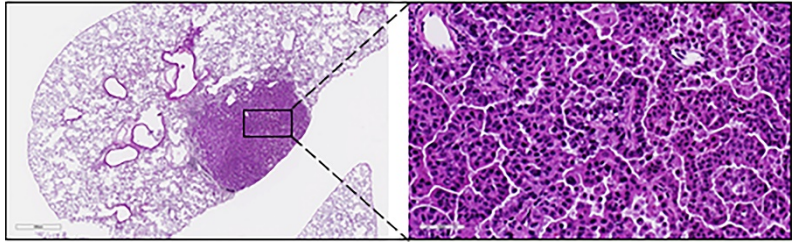

**Supplementary Fig. 6 | Analyses of cell colony formation and lung tumor development after knockout of *Jnk1/2*; Related to Fig. 4.**

**a**, WB analysis of protein levels of JNK1 and JNK2 in mLSCC<sup>LP.3</sup> cells, which were isolated from *Lkb1<sup>d/d</sup>Pten<sup>d/d</sup>* mouse lung SCCs, after knockout of *Jnk1/2* or scramble (Control) using Lentiviral Cas9/gRNA. **b**, Representative crystal staining of cell colony formation of mLSCC<sup>LP.3</sup> cells after knockout of *Jnk1/2* or scramble (Control) and six random regions were chosen for the semi-quantification (Fig. 4a) using ImageJ. **c**, Representative IHC staining of JNK1/2 in 4-month-old (4M) WT mouse lungs and *Lkb1<sup>d/d</sup>Jnk1<sup>d/d</sup>Jnk2<sup>-/-</sup>* mouse lung pre-neoplastic lesions. Sub-areas (I-IV) were magnified. Scale bar: 200 $\mu$ m (Black box) and 10 $\mu$ m (dark bar). **d**, Representative H&E and IHC staining of 7-month-old (7M) *Lkb1<sup>d/d</sup>Jnk1<sup>d/d</sup>Jnk2<sup>-/-</sup>* mouse lung SCC. Scale bar: 300 $\mu$ m (Black box, left panel), 60 $\mu$ m (Black box, middle panel) and 10 $\mu$ m (dark bar). SCC markers: p63 and CK5; AD marker: TTF1. **e**, Representative H&E and IHC staining of lung adenocarcinoma with squamous differentiation in 7-month-old *Lkb1<sup>d/d</sup>Jnk1<sup>d/d</sup>Jnk2<sup>-/-</sup>* mice. The areas labelled by boxes are magnified as showing the squamous differentiation cells (I) with positive staining of CK5 in the keratinizing cells (II) and p63 in the basal cells (III), and negative staining of TTF1 (IV) which is in the areas staining positive for CK5 and is also pointed by dash outlines. Scale bar: 600 $\mu$ m (Black box, left panel) and 60 $\mu$ m (Black box, right panel). **f**, Representative H&E and IHC staining of lung adenocarcinoma (AD) expressing the typical SCC markers CK5 and p63 in 7-month-old *Lkb1<sup>d/d</sup>Jnk1<sup>d/d</sup>Jnk2<sup>-/-</sup>* mice. These areas showed the AD cells with positive staining of CK5 and p63 while also having with the weak staining of TTF1 (TTF1 is nuclear staining, and the cytoplasmic staining is background.). Scale bar: 60 $\mu$ m (Black box). **g**, Representative H&E staining of lung adenocarcinoma in 12-15-month-old *Jnk1<sup>d/d</sup>Jnk2<sup>-/-</sup>* mice (Supplementary Data 1). Scale bar: 500 $\mu$ m (Black box, left panel); 50 $\mu$ m (Black box, right panel).



Supplementary Fig. 7 | Examination of the inhibition of lung tumor development after Anisomycin treatment; Related to Fig. 5.

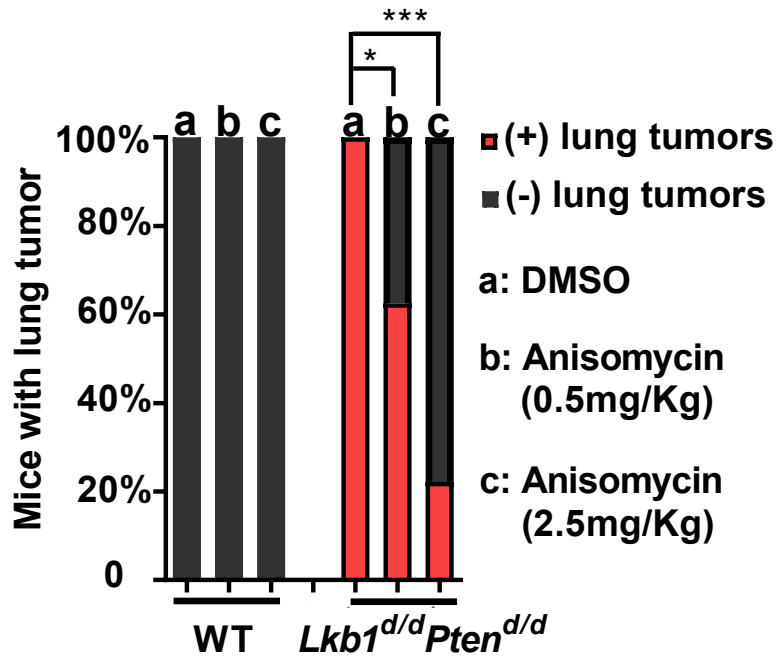

**Supplementary Fig. 7 | Examination of the inhibition of lung tumor development after Anisomycin treatment; Related to Fig. 5.**

Quantification of mice with lung tumors at the endpoint of treatment (Fig. 5d). The b group of *Lkb1<sup>d/d</sup>Pten<sup>d/d</sup>* had eight mice and the remainder of each group included nine mice.  $\chi^2$  test (Two-way): \* P < 0.05; \*\* P < 0.01.

**Supplementary Fig. 8 | P-JNK1/2 expression in the human lung SCCs and the survival analyses; Related to Fig. 6.**

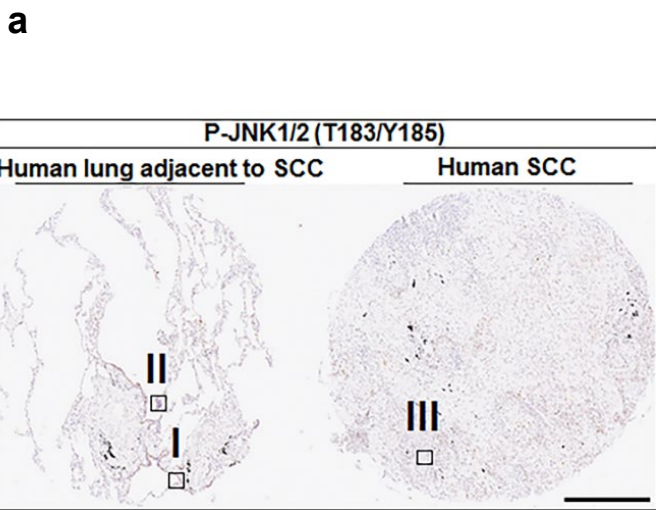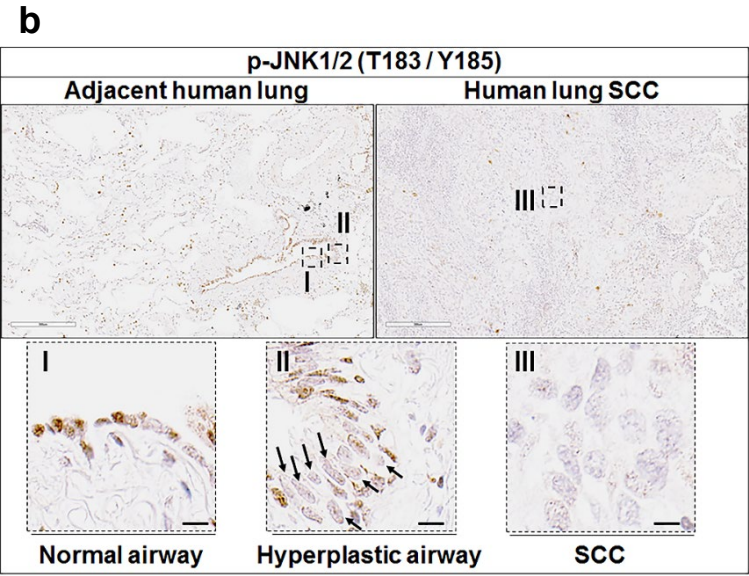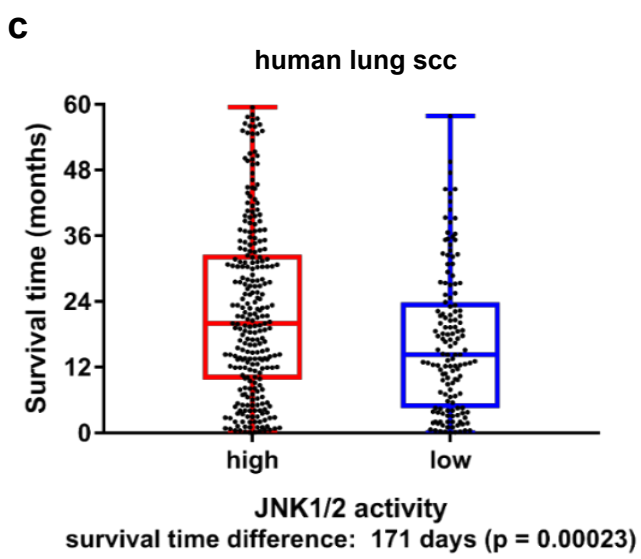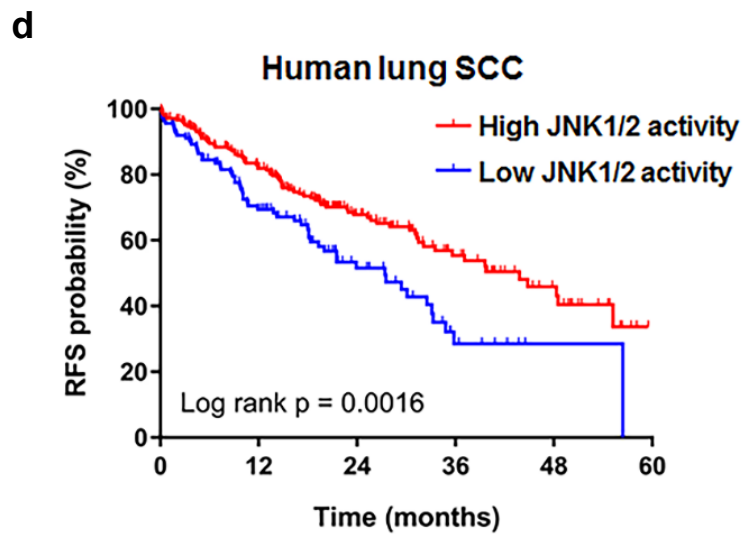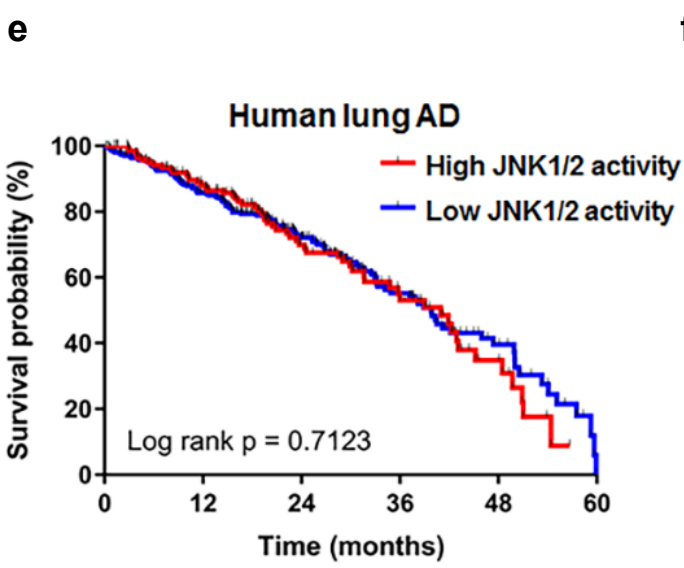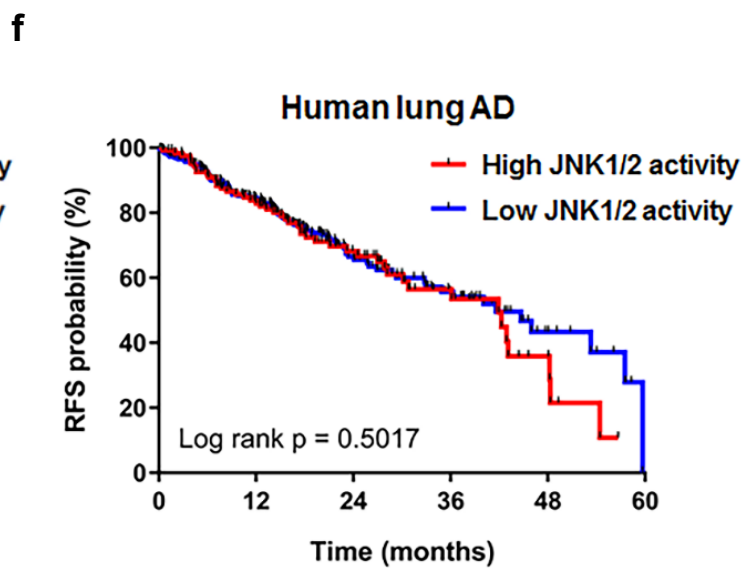

**Supplementary Fig. 8 | P-JNK1/2 expression in the human lung SCCs and the survival analyses; Related to Fig. 6.**

**a**, Representative IHC staining of P-JNK1/2 in human lung SCC and its adjacent lung. Box I: Airway; Box II: Hyperplastic airway; Box III: SCC. Scale bar: 600 $\mu$ m. **b**, Representative IHC staining of P-JNK1/2 in human lung SCC and its adjacent lung. Box I: Airway; Box II: Hyperplastic airway; Box III: SCC. Scale bar: 300 $\mu$ m (Black box) and 10 $\mu$ m (dark bar). Arrows: Weak nuclear staining. **c**, Boxplots of the different survival time of human lung SCC patients. *Jnk1/2* knockout mouse SCC signature score was calculated using the DEGs identified after knockout of *Jnk1/2* in MSCC<sup>LP.3</sup> cells (Supplementary Data 3). A patient's gene signature score was generated after *Jnk1/2* knockout mouse SCC signature was applied to TCGA human LSCC tumors. High JNK1/2 activity was defined as that the patient's gene signature score was lower than 0 and vice versa. Each small black dot represents one patient and T test was performed. **d**, Prediction of human LSCC patient relapse-free survival (RFS) rate using *Jnk1/2* knockout mouse signature. RFS tells how well a new treatment works. Each small bar of curve line represents one patient and T test was performed. **e**, *Jnk1/2* mouse signature was applied to TCGA human lung adenocarcinoma (AD) tumors. It did not predict human lung AD patient survival rate. **f**, *Jnk1/2* mouse signature was applied to TCGA human lung AD tumors. It did not predict human lung AD patient RFS.

**Supplementary Fig. 9 | Full bots of the most important blots in the Figures; Related to Fig. 2, 3, 4 and 5.**

**Fig 2a: p-JNK1/2**

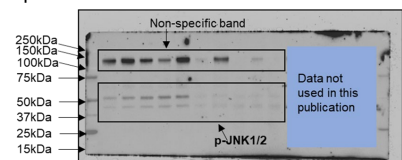

**Fig 2d: p-JNK1/2**

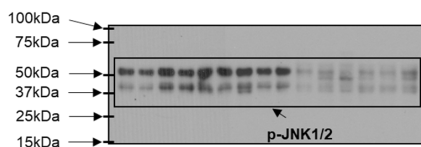

**Fig. 3a: MKK7**

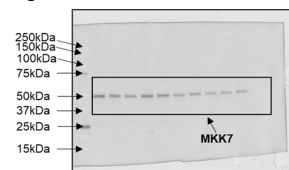

**Fig 2a: JNK1/2**

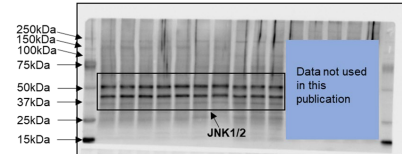

**Fig 2d: JNK1/2**

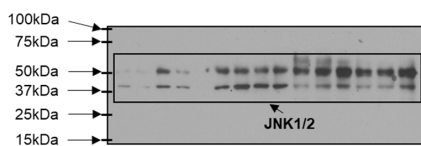

**Fig. 3a: β-actin**

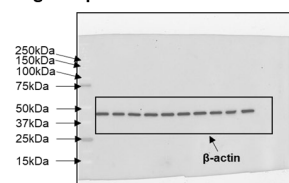

**Fig. 3d: Flag**

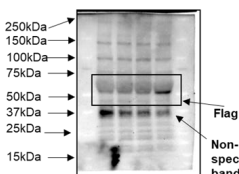

**Fig. 3d: MKK7**

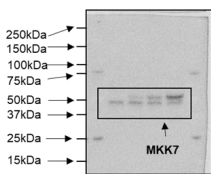

**Fig. 3d: p40 (ΔNp63)**

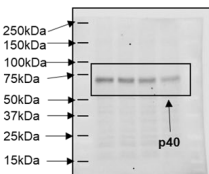

**Fig. 3d: P-JNK1/2**

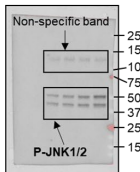

**Fig. 3d: JNK1/2**

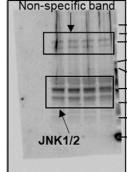

**Fig. 3d: P63**

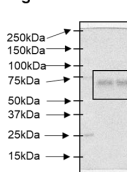

**Fig. 3d: β-actin**

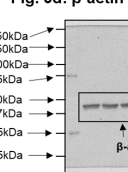

**Fig. 3f: P-JNK1/2**

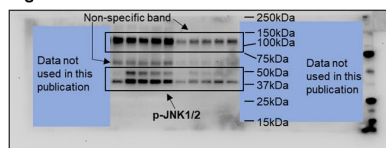

**Fig. 3g: P-JNK1/2**

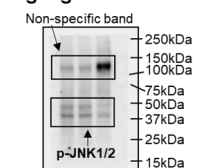

**Fig. 4e: p40 (ΔNp63)**

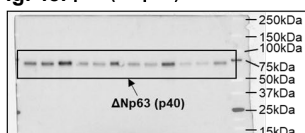

**Fig. 5a: P-JNK1/2**

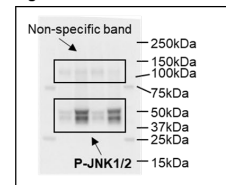

**Fig. 3f: JNK1/2**

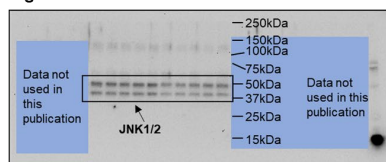

**Fig. 4e: p63**

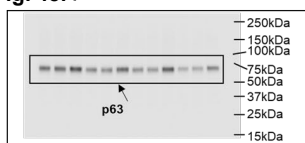

**Fig. 5a: JNK1/2**

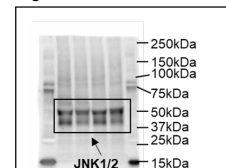

**Fig. 3f: MKK7**

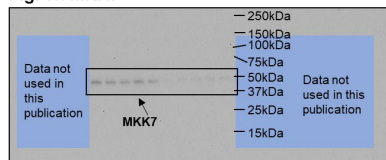

**Fig. 4e: P-JNK1/2**

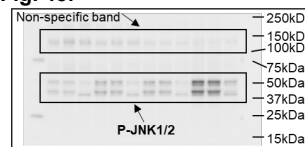

**Fig. 5a: PAPR, Cleaved PAPR and Cleaved Caspase-3**

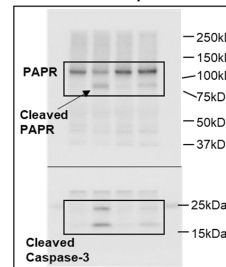

**Fig. 3f: LKB1**

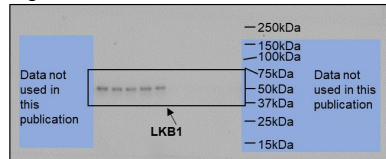

**Fig. 3g: MKK7**

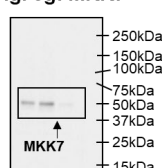

**Fig. 4e: JNK1/2**

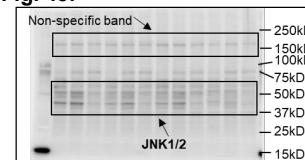

**Fig. 5a: β-actin**

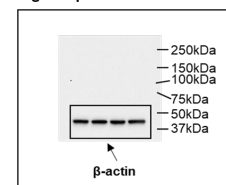

**Fig. 3f: β-actin**

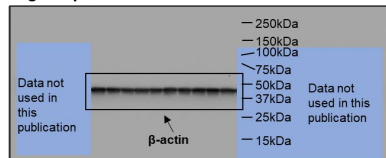

**Fig. 3g: β-actin**

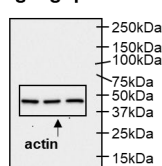

**Fig. 4e: β-actin**

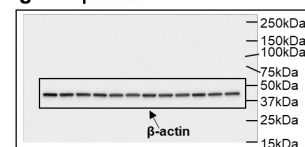

**Supplementary Fig. 9 | Full bots of the most important blots in the Figures; Related to Fig. 2, 3, 4 and 5.**

**Supplementary Table 1** | Top molecular and cellular functions were enriched using Ingenuity pathway analysis (IPA) of DEGs identified in the microarray analysis of 13-month-old *Lkb1<sup>d/d</sup>*-SCC (Supplementary Data 3); Related to Fig. 1 and Table 1.

| <b>Top Molecular and Cellular Functions</b> | <b>P-value</b>      | <b>#Molecules</b> |
|---------------------------------------------|---------------------|-------------------|
| Cellular Movement                           | 7.58E-09 - 6.28E-46 | 854               |
| Cell Morphology                             | 6.54E-09 - 2.27E-28 | 889               |
| Cell Death and Survival                     | 6.06E-09 - 2.03E-23 | 1116              |
| Cell-To-Cell Signaling and Interaction      | 7.08E-09 - 1.09E-22 | 667               |
| Cellular Assembly and Organization          | 7.16E-09 - 5.56E-18 | 674               |

**Supplementary Table 2** | Summary of *Lkb1<sup>d/d</sup>Pten<sup>d/d</sup>* mouse lung phenotypes; Related to Fig. 2 and Table 1.

| Genotype                                    | No. | Age (Month) | The Percent (%) of Phenotypes in Mouse Lungs |      |              |       |      |            |
|---------------------------------------------|-----|-------------|----------------------------------------------|------|--------------|-------|------|------------|
|                                             |     |             | SCC-DS                                       | SCC  | SCC-DS + SCC | AD-DS | AD   | AD-DS + AD |
| <i>Lkb1<sup>d/d</sup>Pten<sup>d/d</sup></i> | 9   | 3M          | 88.9                                         | 88.9 | 100          | 22.2  | 33.3 | 44.4       |

SCC: Squamous cell carcinoma; DS: Development stage; AD: Adenocarcinoma; No.: Number

SCC development stages include epithelial hyperplasia, epithelial hyperplasia with squamous metaplasia, adenocarcinoma with squamous differentiation and adenosquamous carcinoma.

Adenocarcinoma development stages include epithelial hyperplasia and adenoma. No.:

Number; SCC: squamous cell carcinoma; SCC-DS: SCC development stage; AD:

Adenocarcinoma; AD-DS: Adenocarcinoma development stage.



**Supplementary Table 3** | Top enriched upstream regulators were identified from these differentially expressed genes identified in the microarray analysis of 3-month-old *Lkb1<sup>d/d</sup>Pten<sup>d/d</sup>* (SCC + ASC) (Supplementary Data 3) using Ingenuity Pathway Analysis (IPA); Related to Fig. 2 and Table 1.

| <b>Top upstream regulators</b> | <b>P-value of overlap</b> |
|--------------------------------|---------------------------|
| TGFB1                          | 2.17E-65                  |
| beta-estradiol                 | 9.44E-54                  |
| <b>TNF</b>                     | <b>6.79E-41</b>           |
| TP53                           | 1.17E-39                  |
| ERBB2                          | 9.49E-34                  |

**Supplementary Table 4** | Gene set enrichment analysis (GSEA) of enriched pathways in mouse lung tumors; Related to Fig. 1 and 2 and Table 1.

The top 10 enriched oncogenic signatures in GSEA of pre-ranked genes (Supplementary Data 3) detected in microarrays between 13-month-old (13M) *Lkb1<sup>dl/d</sup>* (upper panel) or 3-month-old *Lkb1<sup>dl/d</sup>Pten<sup>dl/d</sup>* (lower panel) mouse lung tumors and the age-matched WT lungs. All detected genes are pre-ranked based on their fold changes (tumor vs WT) from high to low. Indeed, the P-JNK1/2 induced gene signature was also in the top negatively enriched pathways.

| <b>13M <i>Lkb1<sup>dl/d</sup></i>-SCC vs WT</b>     |                                      |             |              |                       |                  |
|-----------------------------------------------------|--------------------------------------|-------------|--------------|-----------------------|------------------|
| <b>Top negatively enriched oncogenic signatures</b> | <b>The names of MSigDB gene sets</b> | <b>Size</b> | <b>NES</b>   | <b>NOM p-val</b>      | <b>FDR q-val</b> |
| Oncogenic KRAS induced signature                    | KRAS.KIDNEY_UP.V1_UP                 | 127         | -4.37        | 0 (P<0.001)           | 0                |
| mTOR induced signature                              | MTOR_UP.N4.V1_DN                     | 135         | -3.52        | 0 (P<0.001)           | 0                |
| PIGF induced signature                              | PIGF_UP.V1_UP                        | 170         | -3.49        | 0 (P<0.001)           | 0                |
| Late serum response inhibited signature             | CSR_LATE_UP.V1_DN                    | 140         | -3.32        | 0 (P<0.001)           | 0                |
| AKT1 inhibited signature                            | AKT_UP.V1_DN                         | 174         | -3.28        | 0 (P<0.001)           | 0                |
| cAMP inhibited signature                            | CAMP_UP.V1_DN                        | 183         | -3.03        | 0 (P<0.001)           | 0                |
| Oncogenic KRAS induced signature                    | KRAS.600_UP.V1_UP                    | 233         | -2.91        | 0 (P<0.001)           | 1.43E-04         |
| ATF2 inhibited signature                            | ATF2_UP.V1_DN                        | 165         | -2.83        | 0 (P<0.001)           | 1.25E-04         |
| <b>P-JNK1/2 induced signature</b>                   | <b>JNK_DN.V1_DN</b>                  | <b>165</b>  | <b>-2.76</b> | <b>0 (P&lt;0.001)</b> | <b>2.25E-04</b>  |
| LEF1 induced signature                              | LEF1_UP.V1_UP                        | 169         | -2.74        | 0 (P<0.001)           | 2.02E-04         |

  

| <b>Top positively enriched oncogenic signatures</b> | <b>The names of MSigDB gene sets</b> | <b>Size</b> | <b>NES</b> | <b>NOM p-val</b> | <b>FDR q-val</b> |
|-----------------------------------------------------|--------------------------------------|-------------|------------|------------------|------------------|
| AKT1 induced signature                              | AKT_UP.V1_UP                         | 158         | 4.10       | 0 (P<0.001)      | 0                |
| AKT1/mTOR induced signature                         | AKT_UP_MTOR_DN.V1_UP                 | 168         | 3.35       | 0 (P<0.001)      | 0                |
| mTOR inhibited signature                            | MTOR_UP.V1_UP                        | 159         | 3.24       | 0 (P<0.001)      | 0                |
| Late serum response induced signature               | CSR_LATE_UP.V1_UP                    | 152         | 3.08       | 0 (P<0.001)      | 0                |
| RPS14 induced signature                             | RPS14_DN.V1_DN                       | 171         | 3.08       | 0 (P<0.001)      | 0                |
| Oncogenic KRAS inhibited signature                  | KRAS.600_UP.V1_DN                    | 234         | 3.01       | 0 (P<0.001)      | 1.55E-04         |
| EZH2 inhibited signature                            | PRC2_EZH2_UP.V1_UP                   | 166         | 2.92       | 0 (P<0.001)      | 1.33E-04         |
| Oncogenic KRAS inhibited signature                  | KRAS.50_UP.V1_DN                     | 37          | 2.76       | 0 (P<0.001)      | 1.16E-04         |
| TP53 inhibited signature                            | P53_DN.V2_UP                         | 119         | 2.71       | 0 (P<0.001)      | 2.28E-04         |
| IL-15 induced signature                             | IL15_UP.V1_UP                        | 161         | 2.69       | 0 (P<0.001)      | 2.95E-04         |

3M *Lkb1*<sup>d/d</sup>*Pten*<sup>d/d</sup>-(SCC + ASC) vs WT

| <b>Top negatively enriched oncogenic signatures</b> | <b>The names of MSigDB gene sets</b> | <b>Size</b> | <b>NES</b>   | <b>NOM p-val</b>     | <b>FDR q-val</b> |
|-----------------------------------------------------|--------------------------------------|-------------|--------------|----------------------|------------------|
| Oncogenic KRAS induced signature                    | KRAS.KIDNEY_UP.V1_UP                 | 129         | -3.85        | 0 (<0.001)           | 0                |
| Oncogenic KRAS induced signature                    | KRAS.600_UP.V1_UP                    | 240         | -3.52        | 0 (<0.001)           | 0                |
| LEF1 induced signature                              | LEF1_UP.V1_UP                        | 175         | -3.47        | 0 (<0.001)           | 0                |
| AKT1 inhibited signature                            | AKT_UP.V1_DN                         | 178         | -3.42        | 0 (<0.001)           | 0                |
| Oncogenic KRAS inhibited signature                  | KRAS.300_UP.V1_UP                    | 123         | -3.35        | 0 (<0.001)           | 0                |
| <b>P-JNK1/2 induced signature</b>                   | <b>JNK_DN.V1_DN</b>                  | <b>165</b>  | <b>-3.22</b> | <b>0 (&lt;0.001)</b> | <b>0</b>         |
| cAMP inhibited signature                            | CAMP_UP.V1_DN                        | 184         | -3.19        | 0 (<0.001)           | 0                |
| mTOR induced signature                              | MTOR_UP.N4.V1_DN                     | 134         | -3.09        | 0 (<0.001)           | 0                |
| Late serum response inhibited signature             | CSR_LATE_UP.V1_DN                    | 142         | -2.98        | 0 (<0.001)           | 0                |
| TGFB1 induced signature                             | TGFB_UP.V1_UP                        | 174         | -2.85        | 0 (<0.001)           | 0                |

  

| <b>Top positively enriched oncogenic signatures</b> | <b>The names of MSigDB gene sets</b> | <b>Size</b> | <b>NES</b> | <b>NOM p-val</b> | <b>FDR q-val</b> |
|-----------------------------------------------------|--------------------------------------|-------------|------------|------------------|------------------|
| AKT1 induced signature                              | AKT_UP.V1_UP                         | 158         | 4.51       | 0 (<0.001)       | 0                |
| mTOR inhibited signature                            | MTOR_UP.V1_UP                        | 158         | 4.15       | 0 (<0.001)       | 0                |
| AKT1/mTOR induced signature                         | AKT_UP_MTOR_DN.V1_UP                 | 170         | 3.62       | 0 (<0.001)       | 0                |
| RPS14 induced signature                             | RPS14_DN.V1_DN                       | 172         | 3.50       | 0 (<0.001)       | 0                |
| cAMP induced signature                              | CAMP_UP.V1_UP                        | 176         | 3.25       | 0 (<0.001)       | 0                |
| Inhibited signature of embryonic stem cells during  | ESC_V6.5_UP_LATE.V1_DN               | 164         | 3.14       | 0 (<0.001)       | 0                |
| EZH2 inhibited signature                            | PRC2_EZH2_UP.V1_UP                   | 172         | 3.10       | 0 (<0.001)       | 0                |
| Mutant p53 induced signature                        | P53_DN.V1_UP                         | 172         | 3.09       | 0 (<0.001)       | 0                |
| Late serum response induced signature               | CSR_LATE_UP.V1_UP                    | 152         | 2.93       | 0 (<0.001)       | 0                |
| IL-15 induced signature                             | IL15_UP.V1_UP                        | 162         | 2.91       | 0 (<0.001)       | 0                |

**Supplementary Table 5** | Summary table of quantification results of kinome array using ImageJ; Related to Fig. 2.

| <b>The average density value of each protein detected from 1M mouse lungs</b> |           |                                  |                                  |                                                           |
|-------------------------------------------------------------------------------|-----------|----------------------------------|----------------------------------|-----------------------------------------------------------|
| <b>The name of protein kinase</b>                                             | <b>WT</b> | <b><i>Lkb1</i><sup>d/d</sup></b> | <b><i>Pten</i><sup>d/d</sup></b> | <b><i>Lkb1</i><sup>d/d</sup><i>Pten</i><sup>d/d</sup></b> |
| JNK pan (T183/Y185, T221/Y223)                                                | 1         | 1.052859                         | 0.662545                         | 0.372398027                                               |
| ERK1/2 (T202/Y204, T185/Y187)                                                 | 1         | 0.882064                         | 0.527209                         | 0.394981609                                               |
| p38 alpha (T180/Y182)                                                         | 1         | 1.3066                           | 0.658162                         | 0.397569028                                               |
| EGFR (Y1086)                                                                  | 1         | 1.233808                         | 0.774525                         | 0.417520101                                               |
| MSK1/2 (S376/S360)                                                            | 1         | 1.045242                         | 0.790596                         | 0.417735829                                               |
| Chk2 (T68)                                                                    | 1         | 1.024578                         | 1.014221                         | 0.473541898                                               |
| STAT5 a/b (Y694/699)                                                          | 1         | 1.000601                         | 0.829341                         | 0.50158671                                                |
| Lck(Y394)                                                                     | 1         | 0.871557                         | 0.828699                         | 0.503437418                                               |
| FAK (Y397)                                                                    | 1         | 0.659071                         | 0.716113                         | 0.517207943                                               |
| Fgr (Y412)                                                                    | 1         | 0.815016                         | 0.797474                         | 0.518284239                                               |
| Lyn(Y397)                                                                     | 1         | 0.960328                         | 0.774783                         | 0.52726489                                                |
| AMPK alpha1 (T174)                                                            | 1         | 1.191487                         | 0.794332                         | 0.5387254                                                 |
| HSP27(S78/82)                                                                 | 1         | 0.818472                         | 0.74554                          | 0.577033205                                               |
| Hck (Y411)                                                                    | 1         | 1.027017                         | 0.680364                         | 0.593472043                                               |
| STAT5b (Y699)                                                                 | 1         | 1.051317                         | 0.921195                         | 0.59697185                                                |
| STAT2 (Y689)                                                                  | 1         | 0.933926                         | 0.853888                         | 0.602910812                                               |
| P53 (S392)                                                                    | 1         | 0.951457                         | 0.960808                         | 0.607071853                                               |
| AMPK $\alpha$ 2(T172)                                                         | 1         | 0.83264                          | 0.885543                         | 0.612023752                                               |
| STAT5a (Y694)                                                                 | 1         | 0.975137                         | 0.869941                         | 0.61752426                                                |
| Yes (Y426)                                                                    | 1         | 0.994963                         | 0.828193                         | 0.641445683                                               |
| STAT6 (Y641)                                                                  | 1         | 1.101679                         | 0.83744                          | 0.66517119                                                |
| PDGFR $\beta$ (Y751)                                                          | 1         | 0.86644                          | 0.80825                          | 0.670192368                                               |
| Src(Y419)                                                                     | 1         | 1.266175                         | 0.819086                         | 0.673472736                                               |
| TOR(S2448)                                                                    | 1         | 1.504978                         | 0.552326                         | 0.67546262                                                |
| p53 (S46)                                                                     | 1         | 0.966849                         | 0.889915                         | 0.683720361                                               |
| p53 (S15)                                                                     | 1         | 0.950526                         | 1.00728                          | 0.698688035                                               |
| p27 (T198)                                                                    | 1         | 1.002939                         | 1.042468                         | 0.706562892                                               |
| c-Jun (S63)                                                                   | 1         | 1.128751                         | 0.913142                         | 0.718101024                                               |
| RPAS40 (T246)                                                                 | 1         | 0.951088                         | 0.884832                         | 0.731117745                                               |
| HSP60                                                                         | 1         | 0.87968                          | 1.353922                         | 0.737644642                                               |
| GSK-3 alpha/beta (S21/S9)                                                     | 1         | 0.920008                         | 0.75263                          | 0.737888883                                               |
| Fyn (Y420)                                                                    | 1         | 1.112742                         | 0.889486                         | 0.751573162                                               |
| TOR(S2448)                                                                    | 1         | 1.194579                         | 0.829074                         | 0.76691129                                                |
| AKT( T308)                                                                    | 1         | 1.124204                         | 0.995622                         | 0.77436609                                                |
| p70 S6 Kinase (T421/424)                                                      | 1         | 1.091681                         | 1.095568                         | 0.817831474                                               |
| RSK1/2/3 (S380/386/377)                                                       | 1         | 1.103252                         | 0.990341                         | 0.867286227                                               |
| STAT3 (S727)                                                                  | 1         | 1.056729                         | 1.05676                          | 0.880199816                                               |
| PLC- $\gamma$ 1                                                               | 1         | 1.182568                         | 1.176786                         | 0.892029611                                               |
| Enos (S1177)                                                                  | 1         | 1.059258                         | 1.16785                          | 0.912287235                                               |
| STAT3 (Y705)                                                                  | 1         | 1.126529                         | 1.115443                         | 0.931141316                                               |
| p70 S6 Kinase (T389)                                                          | 1         | 1.117821                         | 1.068157                         | 0.941608446                                               |
| PYK2 (Y402)                                                                   | 1         | 1.168481                         | 1.000761                         | 0.962570421                                               |
| $\beta$ -Catenin                                                              | 1         | 1.055577                         | 0.855765                         | 1.056644077                                               |
| AKT(S473)                                                                     | 1         | 1.045201                         | 1.587716                         | 1.597629465                                               |
| WNK1 (T60)                                                                    | 1         | 1.072355                         | 1.396029                         | 1.707527565                                               |

**Supplementary Table 6** | Calculation of the bands of p63 and  $\Delta$ Np63 in Fig. 4e; Related to Fig. 4e.

| <b>The ratio of bands between Anisomycin treatment and Anisomycin non-treatment</b>                     |                                        |                      |
|---------------------------------------------------------------------------------------------------------|----------------------------------------|----------------------|
|                                                                                                         | gControl                               | gJnk1/2              |
| $\Delta$ Np63                                                                                           | $0.27 / 1.1 = 0.245$                   | $0.73 / 1.6 = 0.456$ |
| p63                                                                                                     | $0.48 / 1.1 = 0.436$                   | $0.8 / 1.3 = 0.615$  |
| <b>The percent of Anisomycin-induced decrease of <math>\Delta</math>Np63 or p63 depending on JNK1/2</b> |                                        |                      |
|                                                                                                         | $(gJnk1/2 - gControl) / gJnk1/2 * 100$ |                      |
| $\Delta$ Np63                                                                                           | $(0.456 - 0.245) / 0.456 = 46.3\%$     |                      |
| p63                                                                                                     | $(0.615 - 0.436) / 0.615 = 29.1\%$     |                      |

**Supplementary Table 7** | List of the DEGs of p63 pathway, which are identified by IPA in Table 5. Genes labelled in red were upregulated while those labelled in blue were downregulated; Related to Fig. 4.

|                |               |               |              |                |                     |              |
|----------------|---------------|---------------|--------------|----------------|---------------------|--------------|
| <i>Aen</i>     | <i>Cdkn1a</i> | <i>F3</i>     | <i>Inhba</i> | <i>Maff</i>    | <i>Serpib2</i>      | <i>Ube2h</i> |
| <i>Apaf1</i>   | <i>Dll1</i>   | <i>Fas</i>    | <i>Itga2</i> | <i>Mdm2</i>    | <i>Serpine1</i>     | <i>Upk1b</i> |
| <i>Areg</i>    | <i>Dok1</i>   | <i>Fos</i>    | <i>Itga3</i> | <i>Mmp13</i>   | <i>Serpinf1</i>     | <i>Vegfa</i> |
| <i>Bax</i>     | <i>Dusp6</i>  | <i>Foxo3</i>  | <i>Itga7</i> | <i>Myc</i>     | <i>Slc7a11</i>      |              |
| <i>Bcl2l11</i> | <i>Egfr</i>   | <i>Fst</i>    | <i>Itgb1</i> | <i>Mynn</i>    | <i>Smad3</i>        |              |
| <i>Ccnd1</i>   | <i>Ei24</i>   | <i>Hbegf</i>  | <i>Jag1</i>  | <i>Notch1</i>  | <i>Smurf2</i>       |              |
| <i>Ccng1</i>   | <i>Emp1</i>   | <i>Hk2</i>    | <i>Junb</i>  | <i>Pkp2</i>    | <i>Tnfaip8</i>      |              |
| <i>Ccnt2</i>   | <i>Epha2</i>  | <i>Ier3</i>   | <i>Krt7</i>  | <i>Ptpn12</i>  | <i>Traf4</i>        |              |
| <i>Cdk17</i>   | <i>Ercc5</i>  | <i>Il1rap</i> | <i>Lyn</i>   | <i>S100a8</i>  | <b><i>Trp63</i></b> |              |
| <i>Abi2</i>    | <i>Ccne1</i>  | <i>Fanca</i>  | <i>Kcnk1</i> | <i>Pold2</i>   | <i>Tgfb3</i>        |              |
| <i>Adamts1</i> | <i>Cdc25c</i> | <i>Fasn</i>   | <i>Mapk8</i> | <i>Prkag2</i>  | <i>Timp3</i>        |              |
| <i>Ahr</i>     | <i>Cdk1</i>   | <i>Fgfr2</i>  | <i>Mcm10</i> | <i>Prkcz</i>   | <i>Tipin</i>        |              |
| <i>Blm</i>     | <i>Cdkn1b</i> | <i>Fn1</i>    | <i>Mfge8</i> | <i>Prnp</i>    | <i>Tnc</i>          |              |
| <i>Bmp7</i>    | <i>Cks2</i>   | <i>G6pdx</i>  | <i>Mlh1</i>  | <i>Racgap1</i> | <i>Ulk2</i>         |              |
| <i>Brca1</i>   | <i>Col4a1</i> | <i>Id1</i>    | <i>Mpzl2</i> | <i>Rbbp8</i>   | <i>Usp48</i>        |              |
| <i>Cad</i>     | <i>Ddb2</i>   | <i>Id3</i>    | <i>Myb</i>   | <i>Rpa1</i>    | <i>Vdr</i>          |              |
| <i>Ccna2</i>   | <i>Dnmt1</i>  | <i>Igfbp3</i> | <i>Nt5e</i>  | <i>Runx2</i>   | <i>Vim</i>          |              |
| <i>Ccnb1</i>   | <i>F2r</i>    | <i>Igfbp7</i> | <i>Pcna</i>  | <i>Spr3</i>    |                     |              |

**Supplementary Table 8** | The LSCC patients' information of tissue array from Baylor College of Medicine; Related to Fig. 6 and Supplementary Fig. 8.

| Accession # | Slide ID tumor | Slide ID normal | Type  | Race         | Ethnicity    | Gender | Age @ surgery | Pathological Stage | Grade                 | Overall stage | Smoking status                | Other Treatment (post surgical)     | Vital Status | Years from Surgery | Recurrence         |
|-------------|----------------|-----------------|-------|--------------|--------------|--------|---------------|--------------------|-----------------------|---------------|-------------------------------|-------------------------------------|--------------|--------------------|--------------------|
| SP10-00488  | b9a554b4       | 7c405ff1        | squam | black        | not hispanic | M      | 66            | pT1b pN0 pM0       | G3                    | Stage IB      | Current smoker >25 pack-years | unknown                             | unknown      | >5 yrs             | no follow up       |
| SP10-01122  | 9b5d8494       | ddc3b238        | squam | white        | not hispanic | M      | 75            | pT2a pN0 pM0       | G3                    | Stage IB      | Former smoker >25 pack-years  | XRT                                 | Deceased     | <2 yrs             | no                 |
| SP10-04944  | de4ad78e       | 8997166b        | squam | white        | not hispanic | M      | 48            | pT3 pN1 pM0        | GX                    | Stage IIIB    | Former smoker >25 pack-years  | chemo prior to surgery              | Alive        | >5 yrs             | persistent disease |
| SP11-00892  | ebb978e1       | ef58fff1        | squam | white        | not hispanic | M      | 58            | pT2b pN1 pM0       | G3                    | Stage IIB     | Former smoker >25 pack-years  | none                                | Deceased     | <2 yrs             | no                 |
| SP11-02469  | cea76a06       | 04117d87        | squam | not reported | not hispanic | M      | 66            | pT2a pN0 pM0       | G3                    | Stage IB      | Former smoker >25 pack-years  | none                                | Deceased     | <2 yrs             | no                 |
| SP11-04661  | e73e99c7       | fc85796e        | squam | white        | not hispanic | M      | 79            | pT2a pN0 pM0       | G3                    | Stage IB      | Current smoker >25 pack-years | none                                | Alive        | >5yrs              | no                 |
| SP11-06980  | ca0ccdf7       | e684f11c        | squam | white        | not hispanic | M      | 69            | pT2a pN2 pM0       | G3                    | Stage IIIA    | Former smoker >25 pack-years  | carbo/Taxol                         | Alive        | >2yrs, <5yrs       | no                 |
| SP12-00500  | 1bd8b159       | 109dc455        | squam | white        | not hispanic | M      | 66            | pT1a pN0 pM0       | G4 (small) G3 (squam) | Stage IA      | Current smoker >25 pack-years | unknown                             | unknown      | >2yrs, <5yrs       | no follow up       |
| SP12-03245  | b905791e       | 22a63a57        | squam | white        | not hispanic | M      | 64            | pT2a pN0 pM0       | G4                    | Stage IB      | Former smoker >25 pack-years  | none                                | Alive        | >2yrs, <5yrs       | no                 |
| SP12-05262  | 483e8f23       | b3f173d2        | squam | white        | not hispanic | M      | 64            | pT2b pN0 pM0       | G2                    | Stage IIA     | Former smoker >25 pack-years  | cisplatinum/etoposide               | Alive        | >2yrs, <5yrs       | no                 |
| SP12-05755  | 973af4d0       | 463174e0        | squam | white        | not hispanic | M      | 66            | pT2a pN1 pM0       | G3                    | Stage IIA     | Current smoker >25 pack-years | unknown                             | unknown      | >2yrs, <5yrs       | no follow up       |
| SP12-10328  | 39ad5e8d       | 1b6eb393        | squam | white        | not hispanic | M      | 75            | pT2a pN0 pM0       | G2                    | Stage IB      | Former Smoker >25 pack-years  | none                                | Alive        | >2yrs, <5yrs       | no                 |
| SP12-12095  | 61b78443       | 3e8b2cd7        | squam | white        | not hispanic | M      | 63            | pT2b pN0 pM0       | G3                    | Stage IIA     | Current smoker >25 pack-years | none                                | Alive        | >2yrs, <5yrs       | no                 |
| SP12-12635  | c07aa97a       | 2868030d        | squam | white        | not hispanic | M      | 61            | pT1b pN0 pM0       | G3                    | Stage IA      | Current smoker >25 pack-years | unknown                             | unknown      |                    | no follow up       |
| SP12-12805  | 1baa570a       | 5d55a35b        | squam | white        | not hispanic | M      | 56            | pT2a pN1 pM0       | G3                    | Stage IA      | Current smoker >25 pack-years | chemo therapy with outside provider | Alive        | >2yrs, <5yrs       | yes                |
| SP13-03334  | c6a66bad       | f3e51e69        | squam | black        | not hispanic | M      | 67            | pT2a pN2 pM0       | G3                    | Stage IIIA    | Current smoker >25 pack-years | unknown                             | unknown      |                    | no follow up       |
| SP14-10607  | 9fce6a3T2      | 69607b5b        | squam | white        | not hispanic | M      | 84            | pT1b pN0 pM0       | G3                    | Stage IA      | Former Smoker >25 pack-years  | none                                | Deceased     | <2yrs              | no                 |
| SP14-11815  | d598ae3e       | 73a02366        | squam | white        | not hispanic | M      | 71            | pT1b pN0 pM0       | G2                    | Stage IA      | Former Smoker >25 pack-years  | none                                | Alive        | >2yrs, <5yrs       | no                 |
| SP14-12328  | abece7bd       | 6e3cac44        | squam | white        | not hispanic | M      | 71            | pT1b pN0 pM0       | G3                    | Stage IIA     | Former Smoker <25 pack-years  | unknown                             | unknown      |                    | no follow up       |
| SP11-01344  | c7147fe3       | 2dfdac66        | squam | black        | not hispanic | M      | 71            | pT1a pN0 pM0       | G3                    | Stage IA      | never                         | none                                | Alive        | >2yrs, <5yrs       | no                 |
| SP11-08425  | 0355d67b       | 63a8c7f9        | squam | white        | not hispanic | M      | 65            | pT1b pN0 pM1       | G3                    | Stage IA      | Current smoker >25 pack-years | carbo/Taxol                         | Deceased     | >2yrs, <5yrs       | yes, <2 yrs        |

**Sup. Table 9** | Sequence list of SYBR primers and gRNAs, Related to Fig. 3-5 and Supplementary Fig. 1, 5 and 6.

| <b>Oligo Name (Specie)</b>      | <b>Sequence 5' to 3'</b>      |
|---------------------------------|-------------------------------|
| P40(F) 1(Mouse)                 | ATGTTGTACCTGG AAAACAATGCC     |
| P40(R) 1(Mouse)                 | CAGGCATGGC ACGGATAAC          |
| PD-L1(F) 1(Mouse)               | GACCAGCTTTTTGAAGGGAAATG       |
| PD-L1(R) 1(Mouse)               | CTGGTTGATTTTGCGGTATGG         |
| <b>The gRNA targeting genes</b> | <b>The sequences of gRNAs</b> |
| Mouse Mapk8 CRISPR guide RNA 1  | TCGCTACTACAGAGCACCAG          |
| Mouse Mapk8 CRISPR guide RNA 2  | CCAGAGGTCATTCTCGGCAT          |
| Mouse Mapk8 CRISPR guide RNA 3  | ACCAGAGGTCATTCTCGGCA          |
| Mouse Mapk9 CRISPR guide RNA 1  | AGGCTCTCTTTGCGTGCGTT          |
| Mouse Mapk9 CRISPR guide RNA 2  | TAAGAGGACGAGTTCACGGT          |
| Mouse Mapk9 CRISPR guide RNA 3  | ACTTTAAGAGGACGAGTTCA          |
| Mouse Mapk9 CRISPR guide RNA 4  | GCGTGCGTTTGGTTCTGAAA          |
| Human LKB1 CRISPR guide RNA     | CAGGTGTCGTCCGCCGCGAA          |
| Human PTEN CRISPR guide RNA     | ACCGCAAATTTAATTGCAG           |
| Human MAPK8 CRISPR guide RNA    | TCGCTACTACAGAGCACCCG          |
| Human MAPK9 CRISPR guide RNA    | AATGGATGCTAACTTATGTC          |
