# Supplementary material for: JNK1/2 represses Lkb1-deficiency-induced lung squamous cell carcinoma progression
Source: PubMed Central journal article supplement (PMC6517592; doi:10.1038/s41467-019-09843-1), 2019-05-14
Supplement: 41467_2019_9843_MOESM3_ESM.pdf [file 41467_2019_9843_MOESM3_ESM.pdf]

## Description of Additional Supplementary Files

File Name: Supplementary Data 1

Description: Classification of mouse lung pathologic phenotypes based on H&E staining; Related to Fig. 1-3 and Table 1, and Supplementary Fig. 1-4 and 6.

File Name: Supplementary Data 2

Description: Classification of mouse lung pathologic phenotypes based on H&E and immunohistochemistry staining of lung tumor marker proteins; Related to Fig. 1-3 and Table 1, and Supplementary Fig. 1-4 and 6.

File Name: Supplementary Data 3

Description: Gene lists of each microarray; Related to Fig. 1, 4, 6, and Supplementary Fig. 3, 4, 7 and 8.

File Name: Supplementary Data 4

Description: Percent of lung pathologic phenotypes in *Lkb1<sup>d/d</sup>Pten<sup>d/d</sup>* mouse tumors; Related to Fig. 2-3 and Supplementary Fig. 3-4.

File Name: Supplementary Data 5

Description: Detail information of key reagents.
